# Supplementary material for: Probing the Complementarity of FAIMS and Strong Cation Exchange Chromatography in Shotgun Proteomics
Source: PubMed Central journal article supplement — J Am Soc Mass Spectrom. 2013 Feb 12;24(3):431–43. doi: 10.1007/s13361-012-0544-2 (PMC3586169; doi:10.1007/s13361-012-0544-2), 2013-02-12
Supplement: 13361_2012_544_MOESM1_ESM.pdf [file 13361_2012_544_MOESM1_ESM.pdf]

## Supplemental information:

**Supplemental figure 1: a-e** Top: The full MS spectrum and ETD mass spectrum of the five highest scoring peptides identified in the internal CV stepping dataset only. Middle: Full scan mass spectrum (and ETD mass spectrum if present) identified by manual analysis of the external CV stepping dataset. Bottom: Full scan mass spectrum (and ETD mass spectrum if present) identified by manual analysis of the SCX prefractionation dataset. **f-j** Top: The full MS spectrum and ETD mass spectrum of the five highest scoring peptide identified in the SCX dataset only. Middle: Full scan mass spectrum (and ETD mass spectrum if present) identified by manual analysis of the internal CV stepping dataset. Bottom: Full scan mass spectrum (and ETD mass spectrum if present) identified by manual analysis of the external CV stepping dataset.

**Supplemental figure 2: a-e** Top: The full MS spectrum and CID mass spectrum of the five highest scoring peptides identified in the external CV stepping dataset only. Middle: Full scan mass spectrum (and CID mass spectrum if present) identified by manual analysis of the internal CV stepping dataset. Bottom: Full scan mass spectrum (and CID spectrum if present) identified by manual analysis of the SCX prefractionation dataset. **f-j** Top: The full MS spectrum and CID mass spectrum of the five highest scoring peptides identified in the internal dataset only. Middle: Full scan mass spectrum (and CID spectrum if present) identified by manual analysis of the external CV stepping dataset. Bottom: Full scan mass spectrum (and CID spectrum if present) Identified by manual analysis of the SCX prefractionation dataset. **k-o**: The full MS

spectrum and CID mass spectrum of the five highest scoring peptide identified in the SCX dataset only.

**Supplemental table 1:** Mascot significance values and SEQUEST XCorr values applied to the ETD and CID datasets to achieve a 1% FDR.

**Supplemental table 2:** Proteins identified from the ETD datasets, (group 1 yellow = internal FAIMS method, group 2 green = external FAIMS method and group 3 blue = SCX)

**Supplemental table 3:** Peptides identified from the ETD datasets, (group 1 yellow = internal FAIMS method, group 2 green = external FAIMS method and group 3 blue = SCX).

**Supplemental table 4:** Proteins identified from the CID datasets (group 1 yellow = internal FAIMS method, group 2 green = external FAIMS method and group 3 blue = SCX).

**Supplemental table 5:** Peptides identified from the CID datasets (group 1 yellow = internal FAIMS method, group 2 green = external FAIMS method and group 3 blue = SCX).

CV=-50 V [AMGIMNSFVNDIFER]<sup>3+</sup>

RT: 28.26

Supp fig 1a

Internal

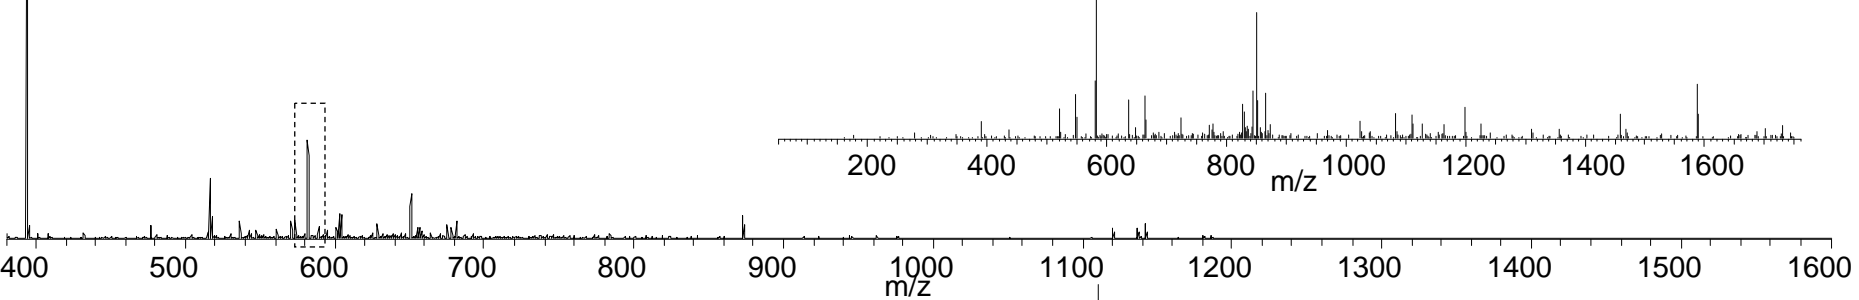

CV=-50 V

RT: 27.22

External

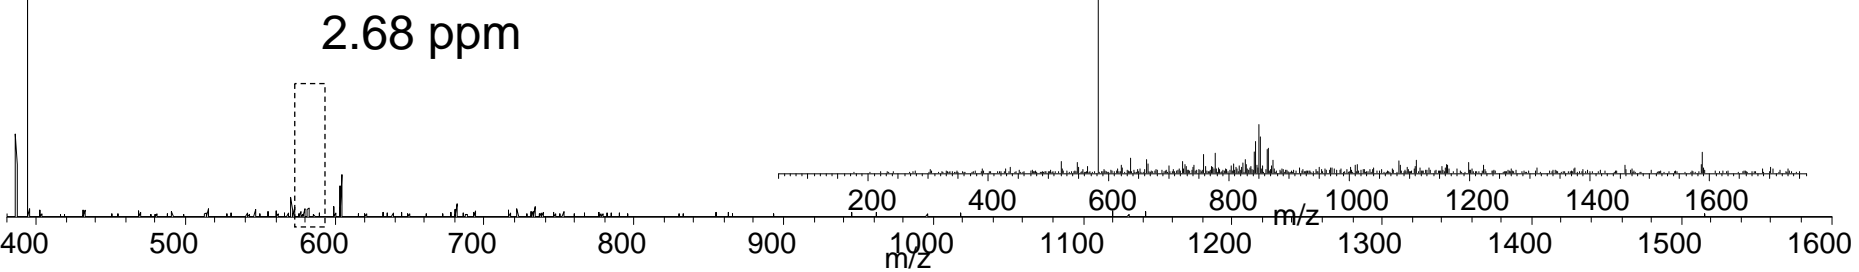

Internal

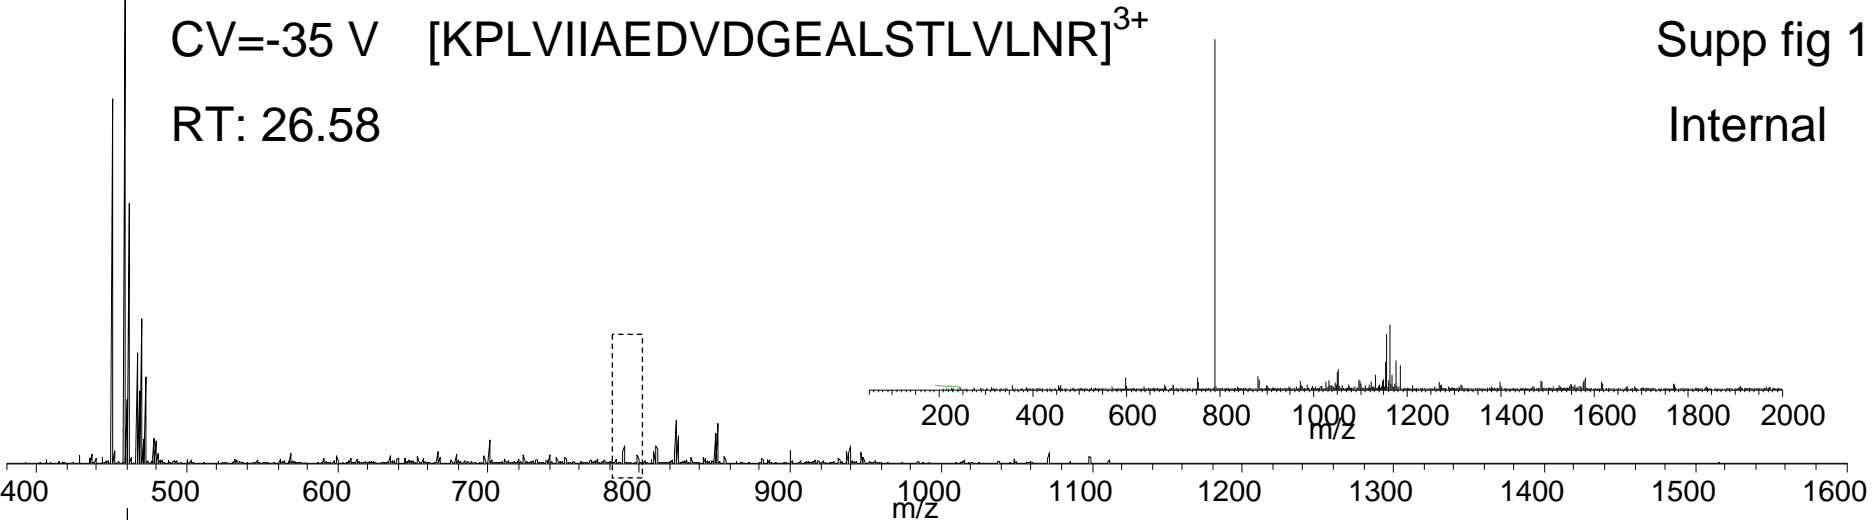

External

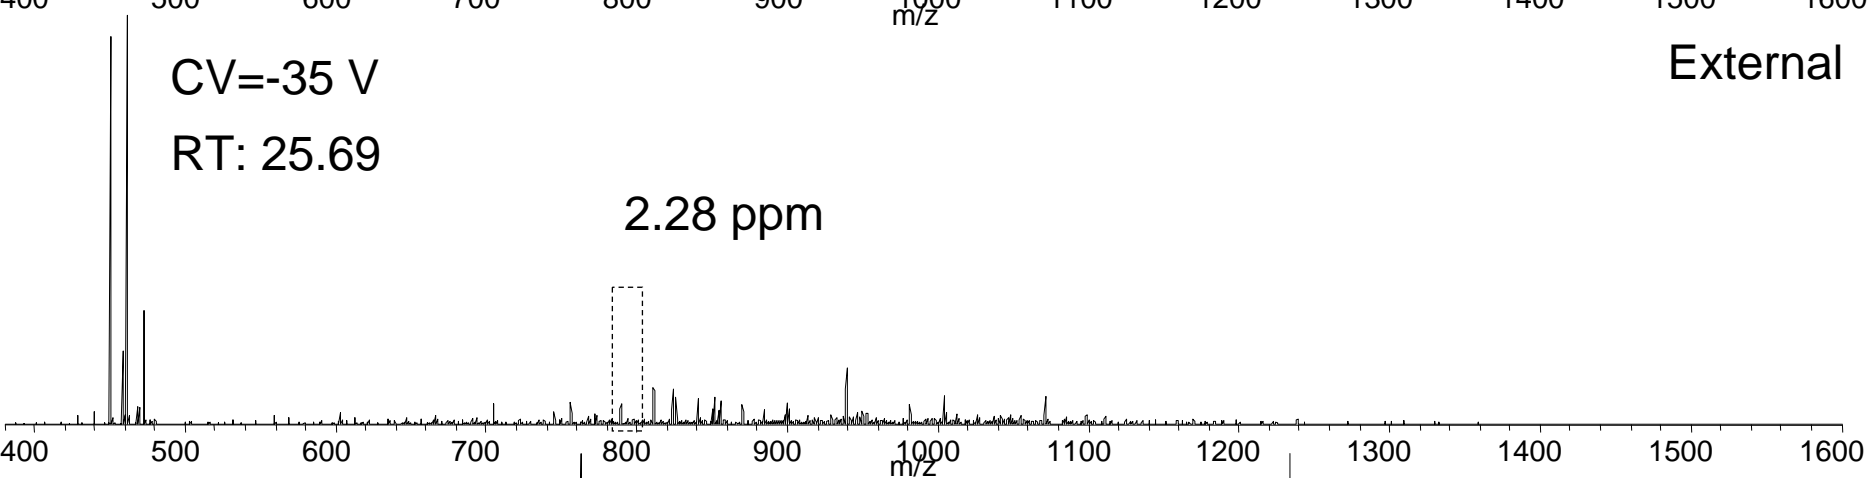

SCX

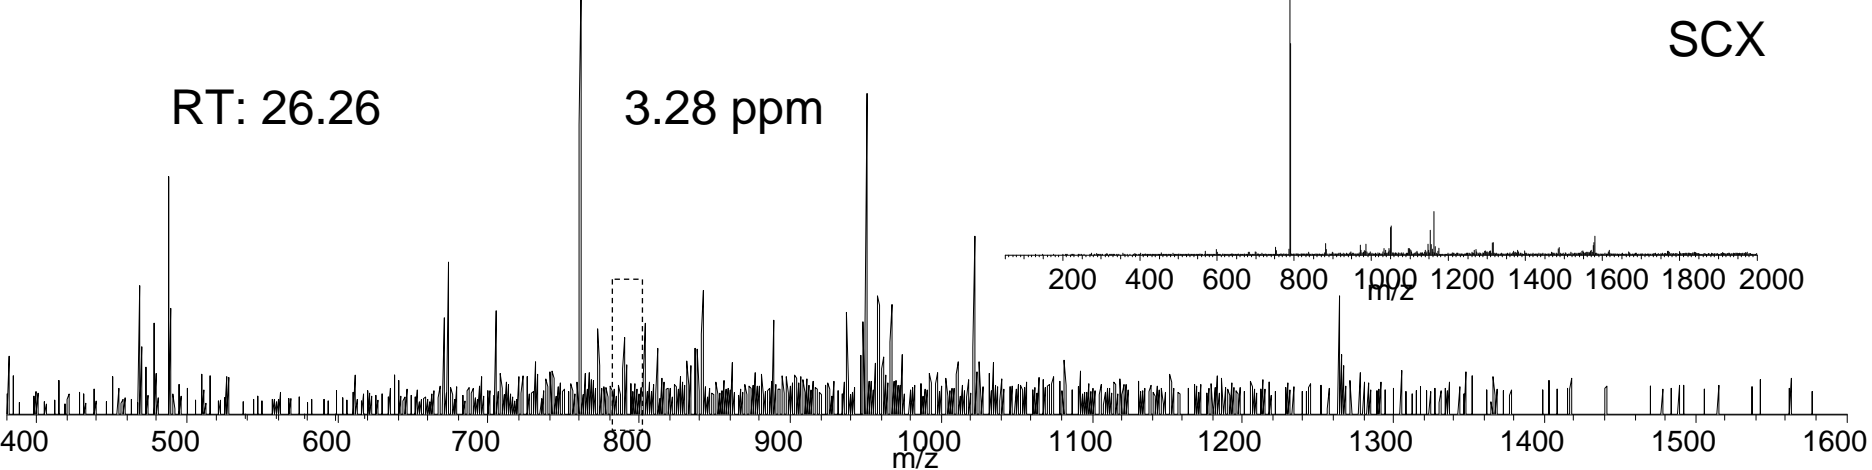

CV=-25 V

[TALLDAAGVASLLTTAEVTVTEIPKEEK]<sup>3+</sup>

Supp fig 1c

RT: 31.71

Internal

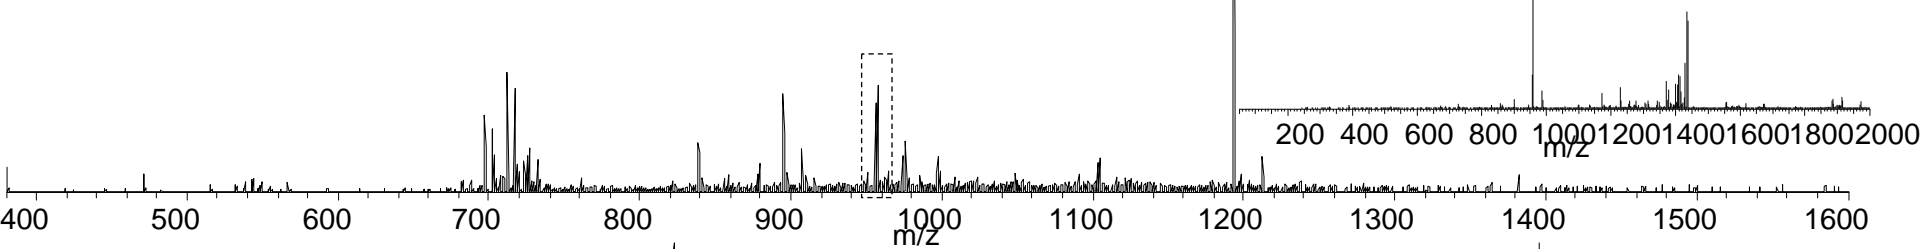

CV=-25 V

RT: 30.80

External

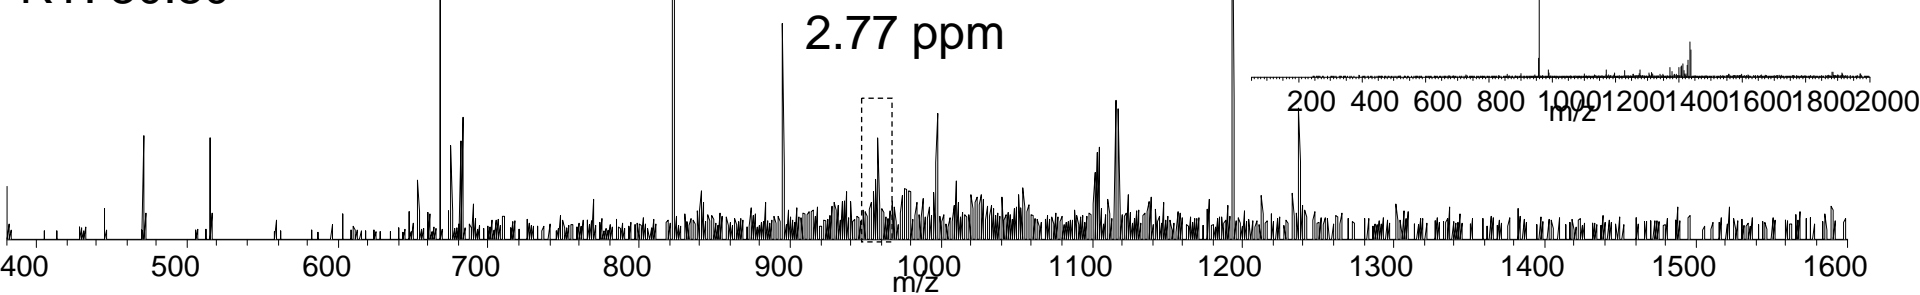

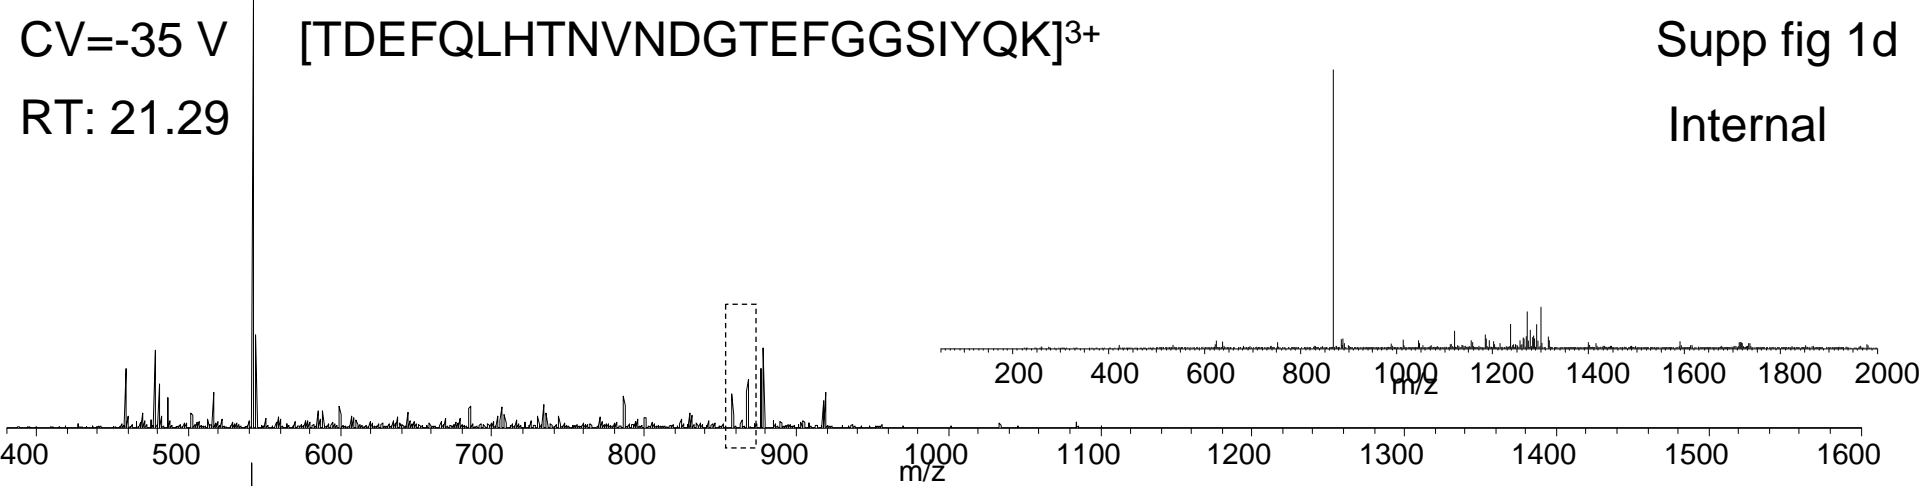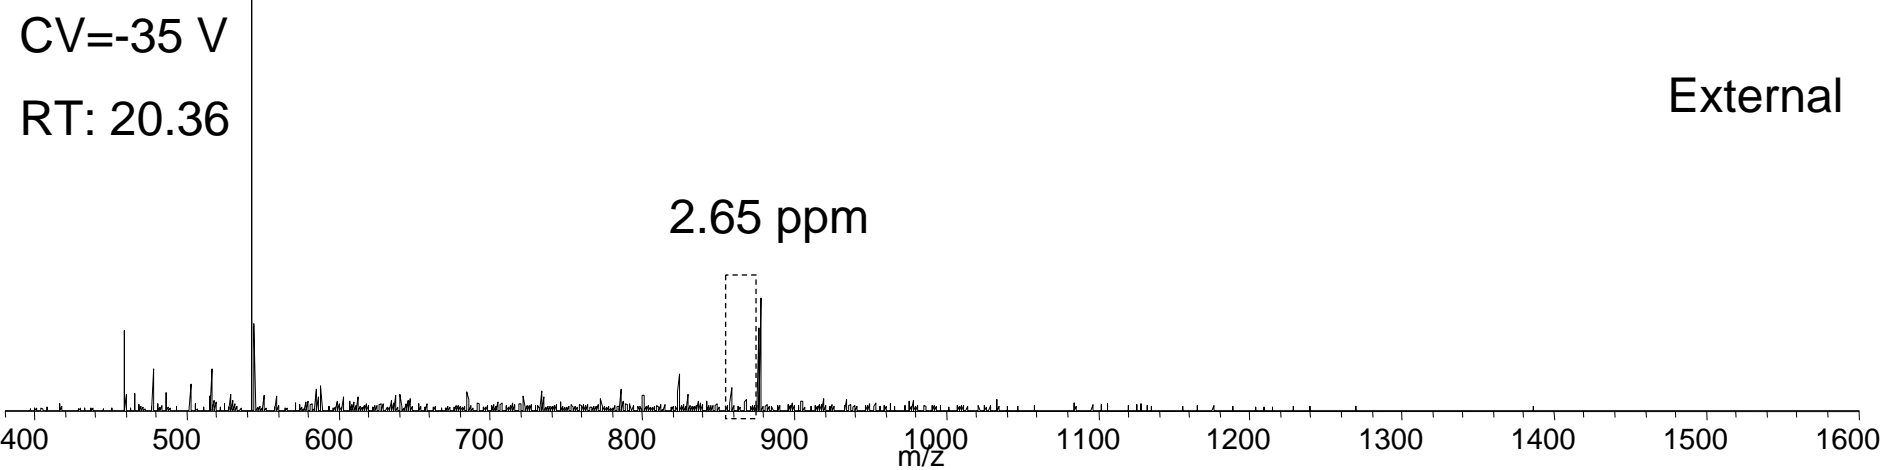

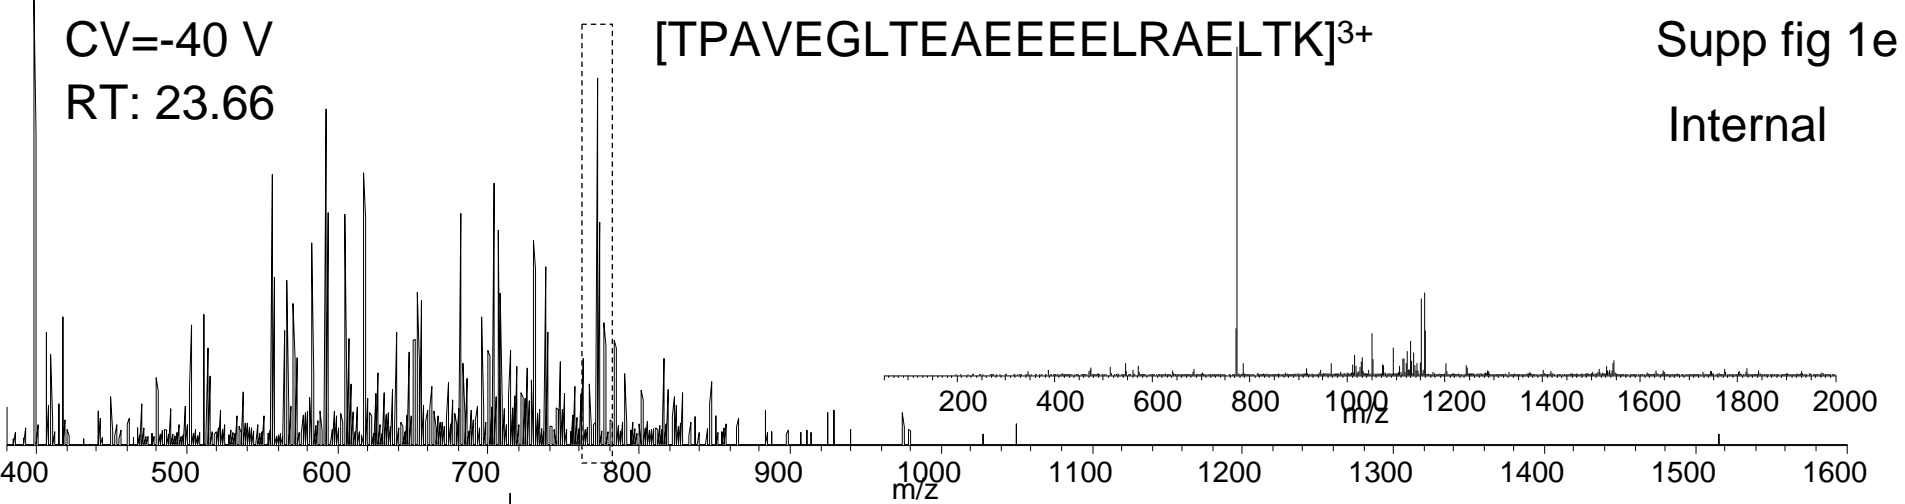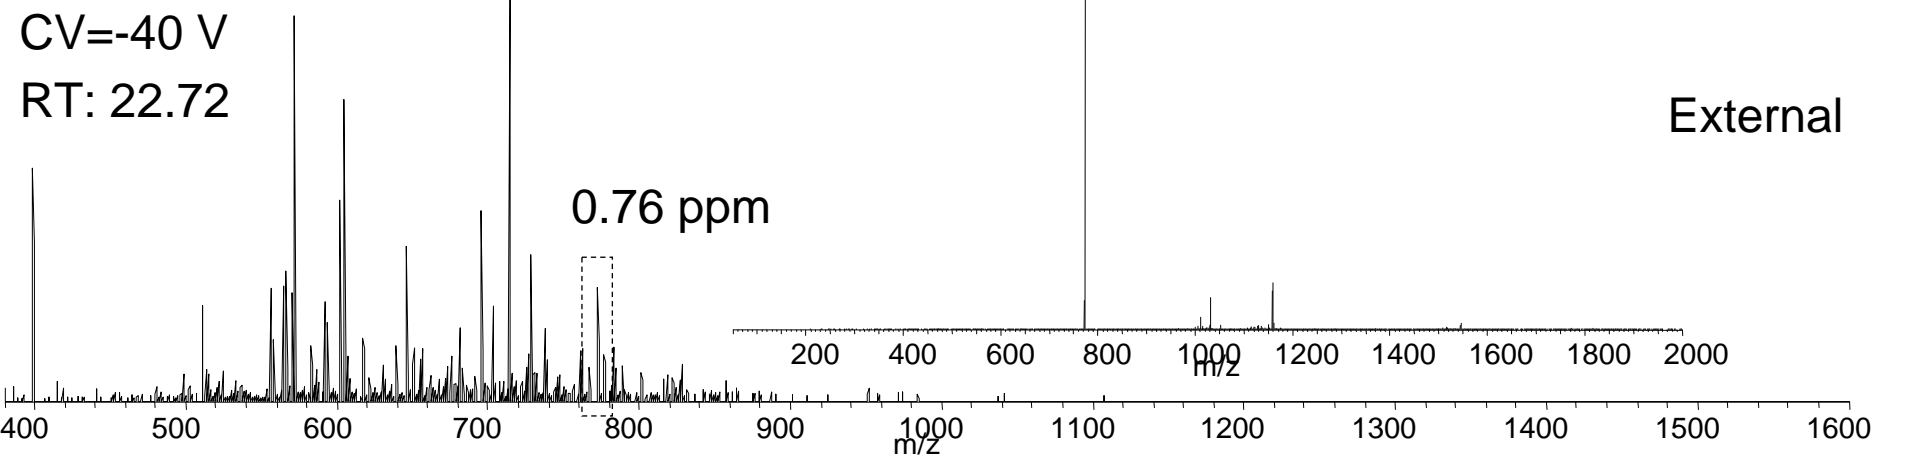

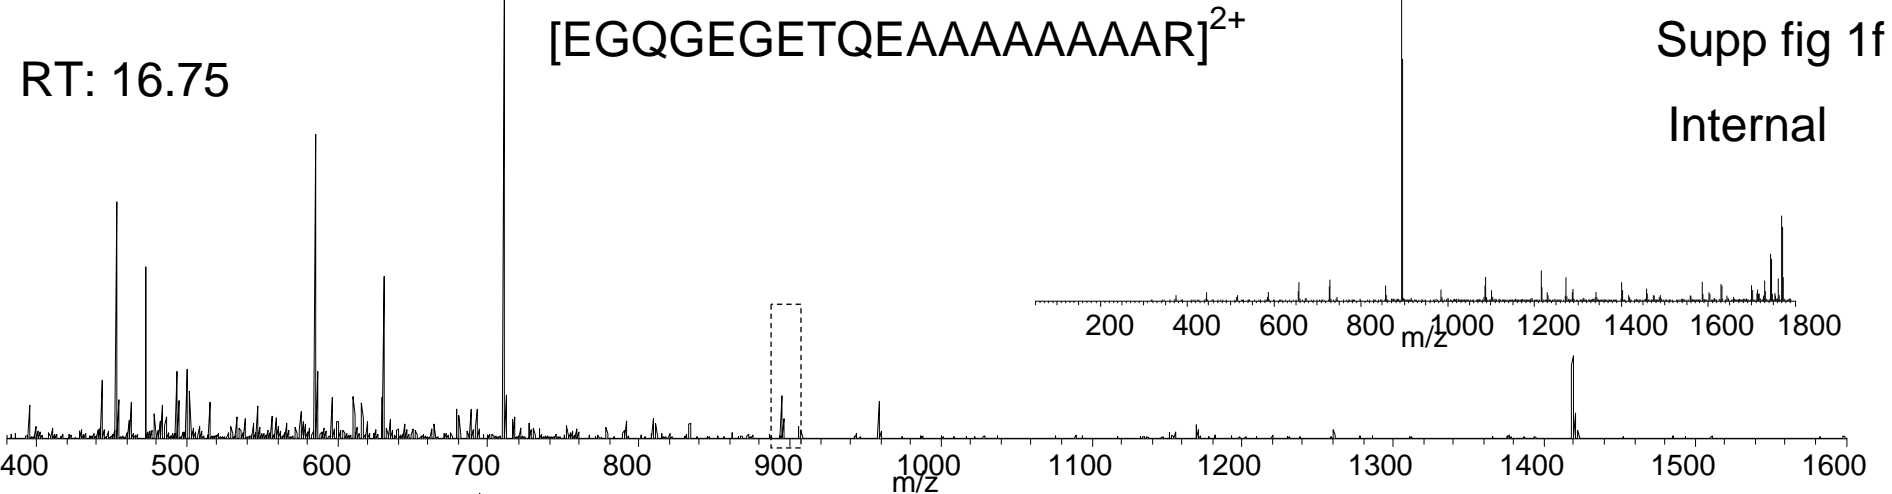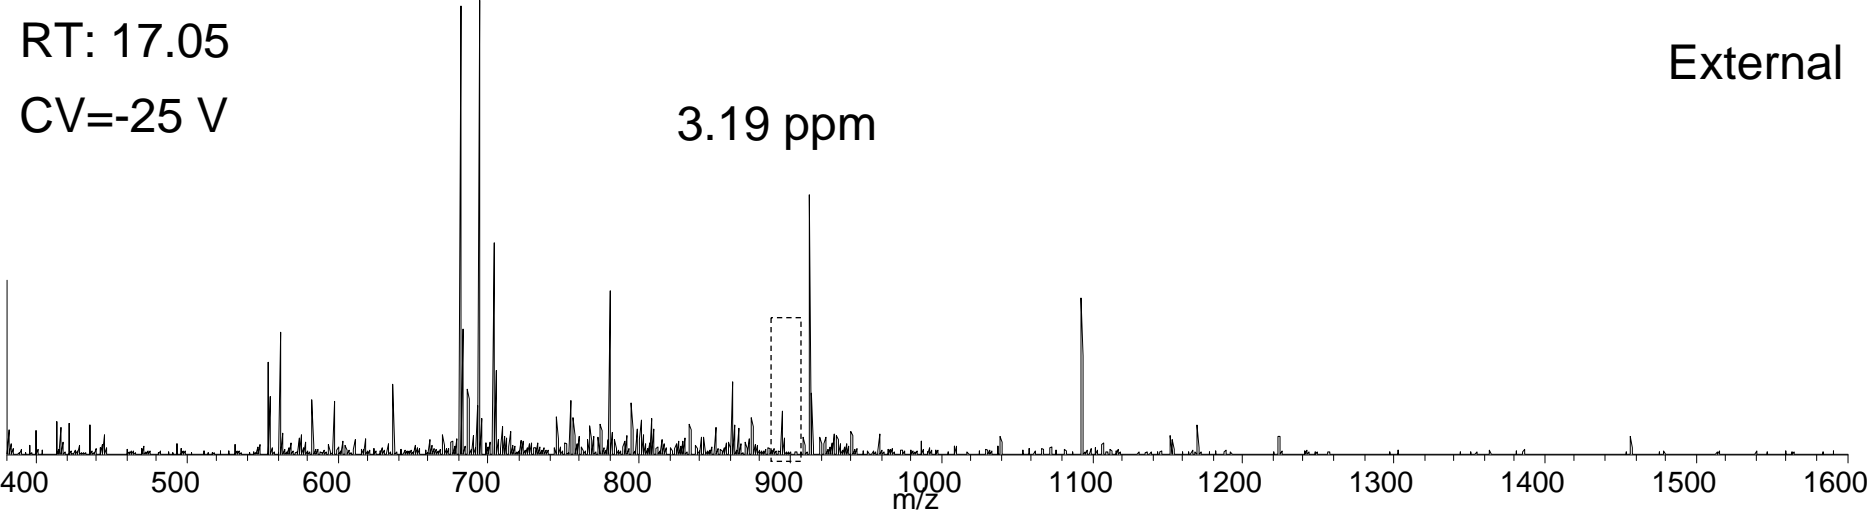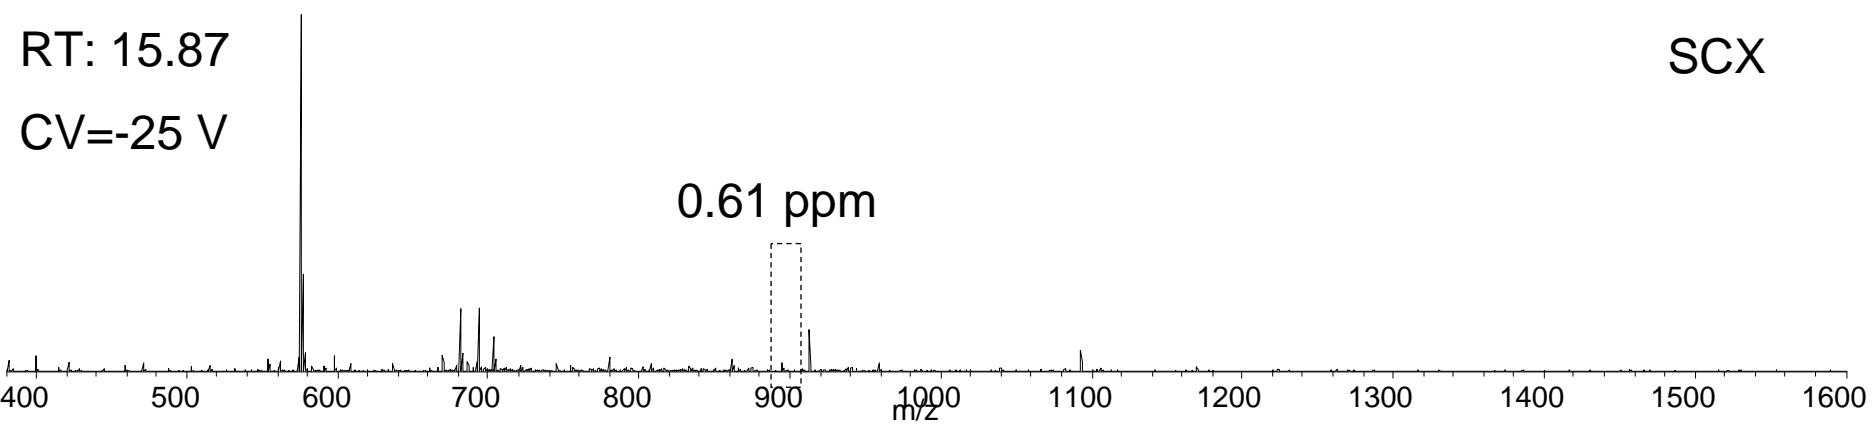



[GVVPLAGTNGETTTQGLDGLSER]<sup>2+</sup>

RT: 21.41

Supp fig 1g

Internal

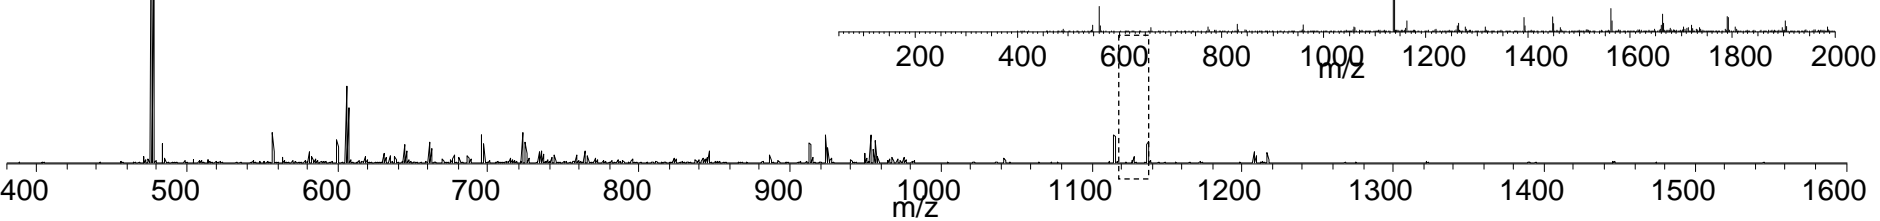

CV=-25 V

RT: 20.83

External

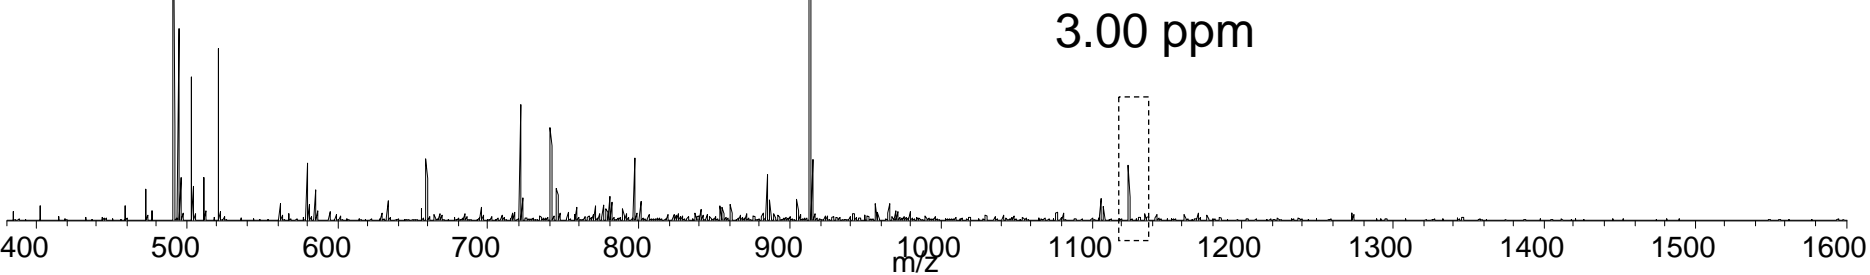

RT: 18.60

[SAAQAAAQTNSNAAGK]<sup>3+</sup>

Supp fig 1h

SCX

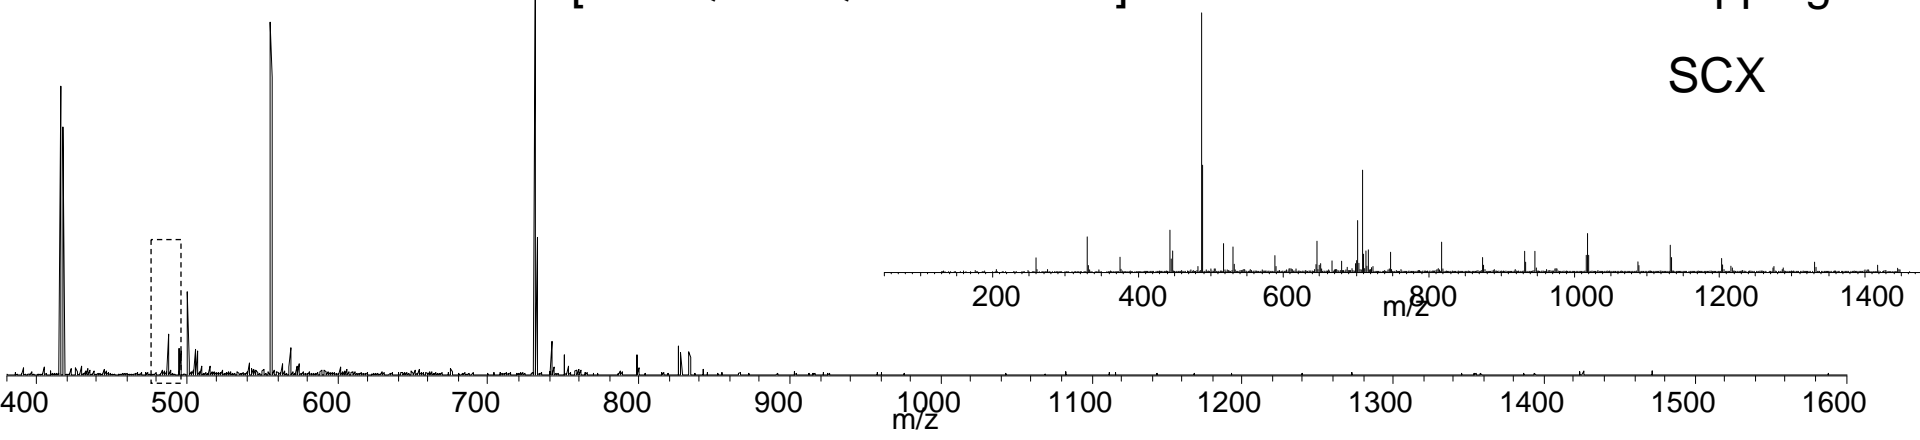

[SSGNSSSSGSGSGSTAGSSSPGAR]<sup>2+</sup>

RT: 11.38

Supp fig 1i

SCX

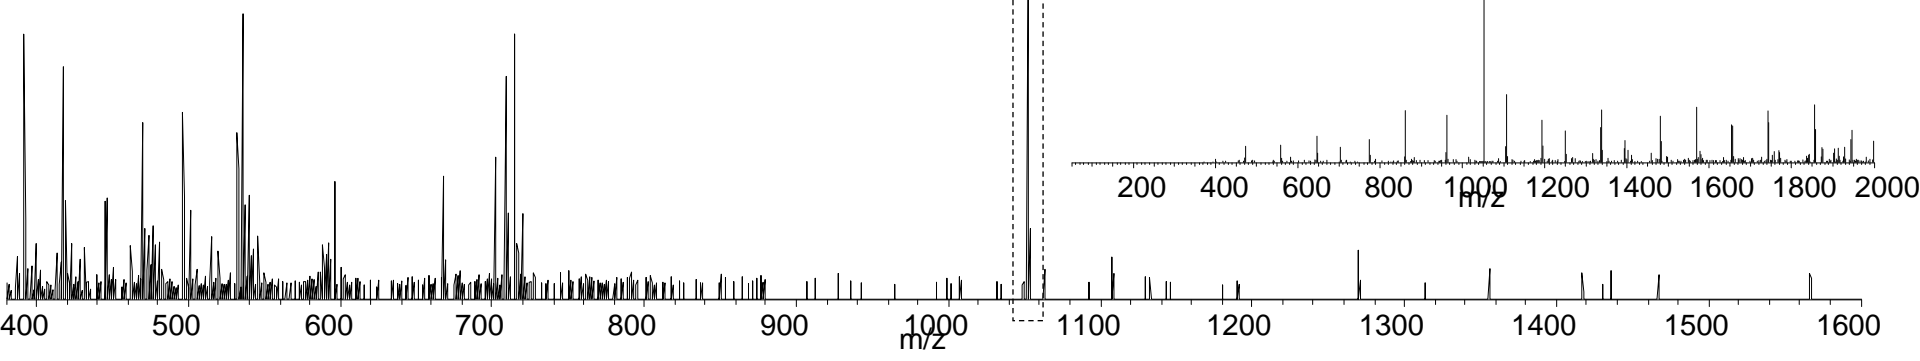

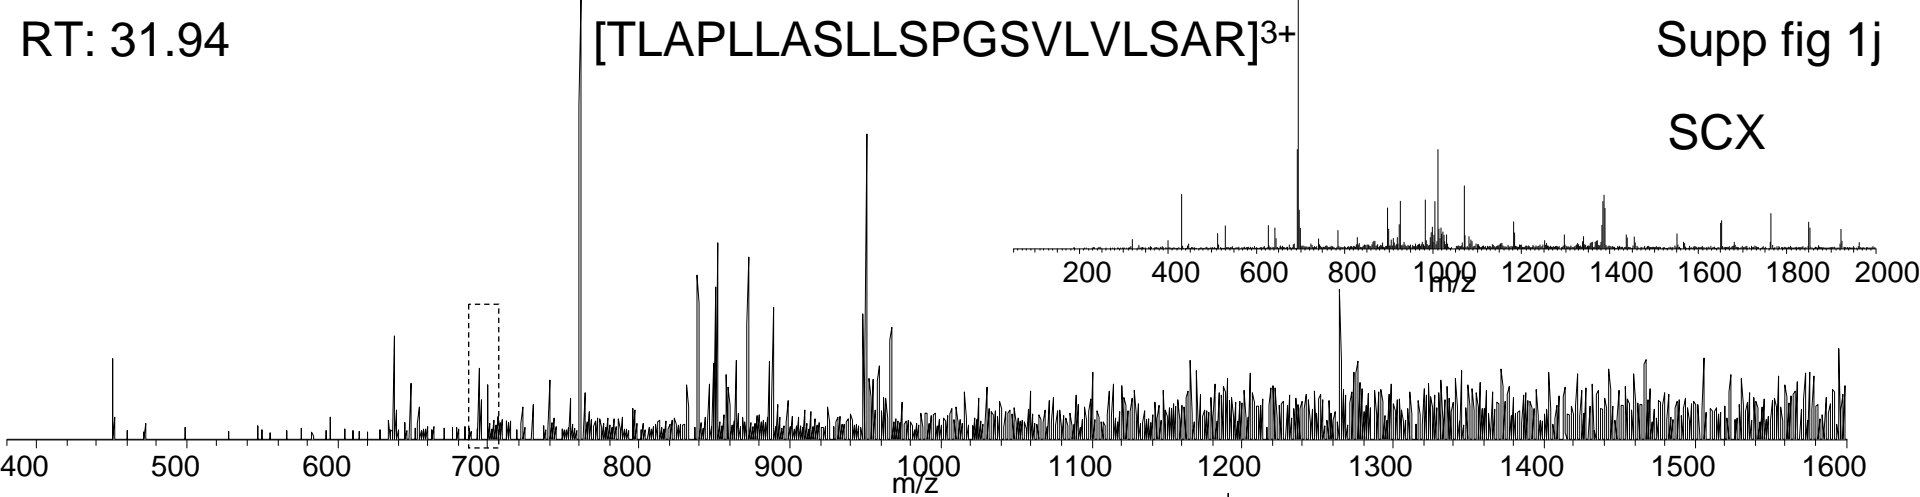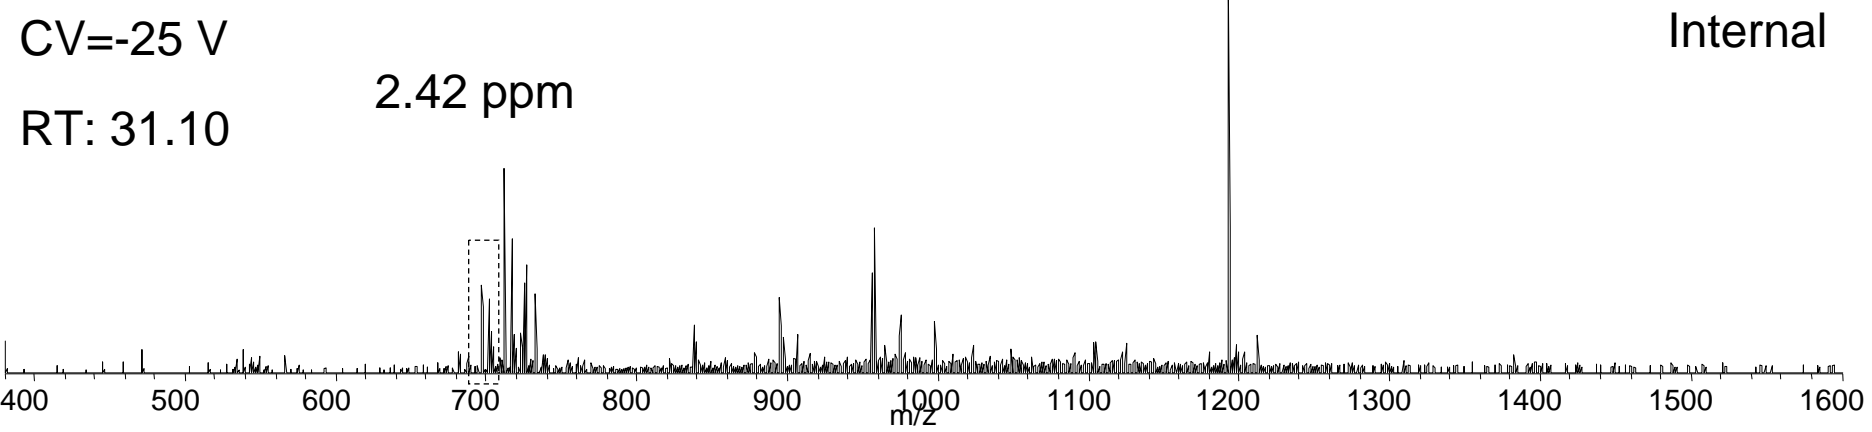

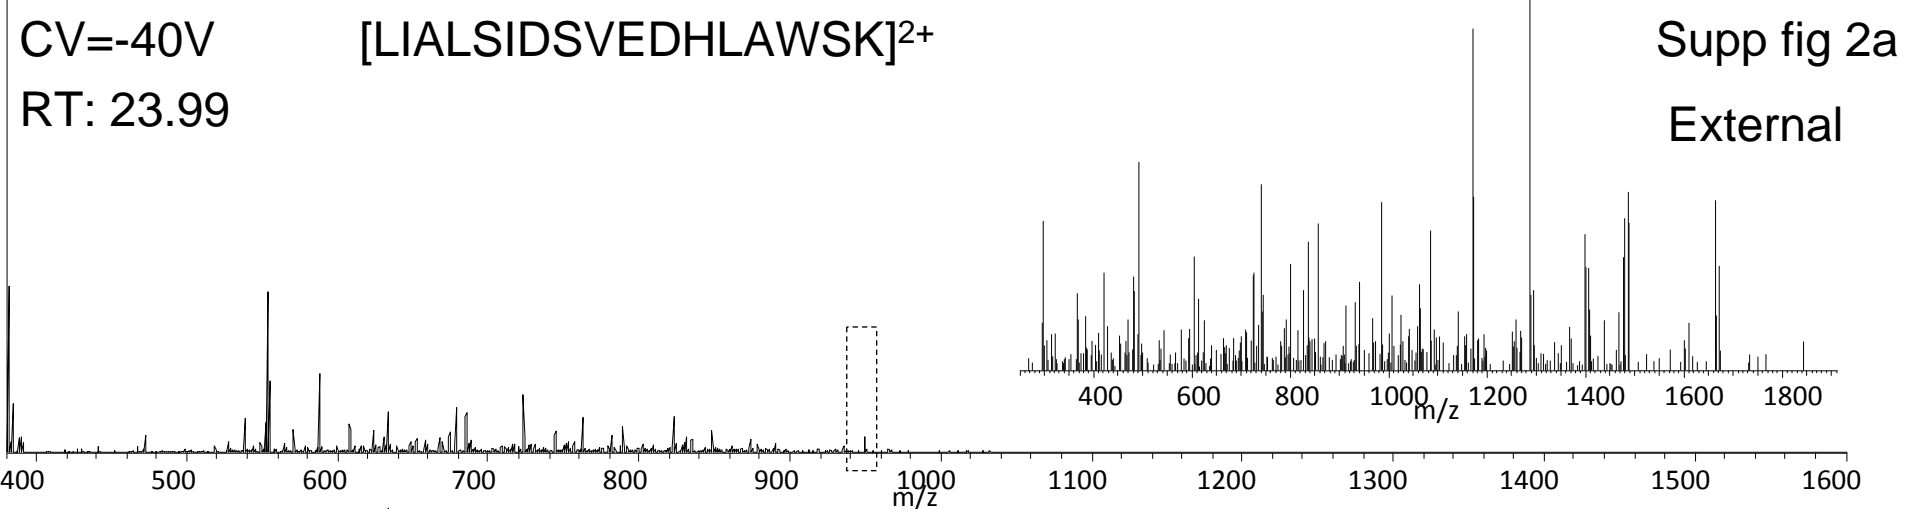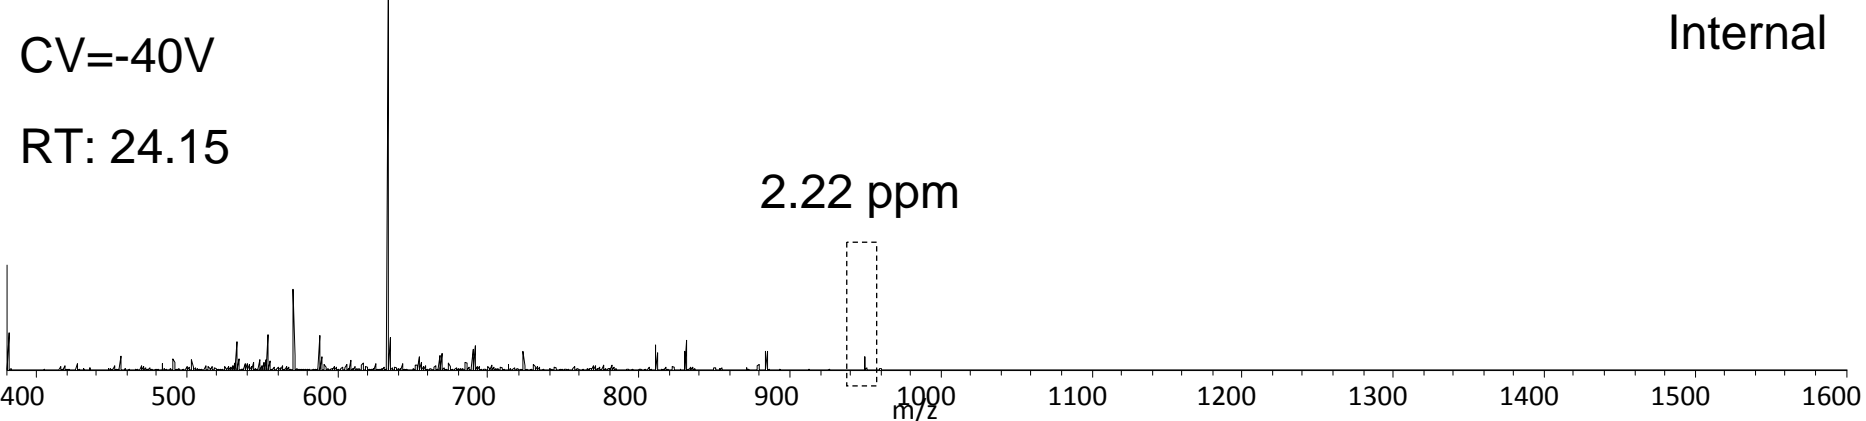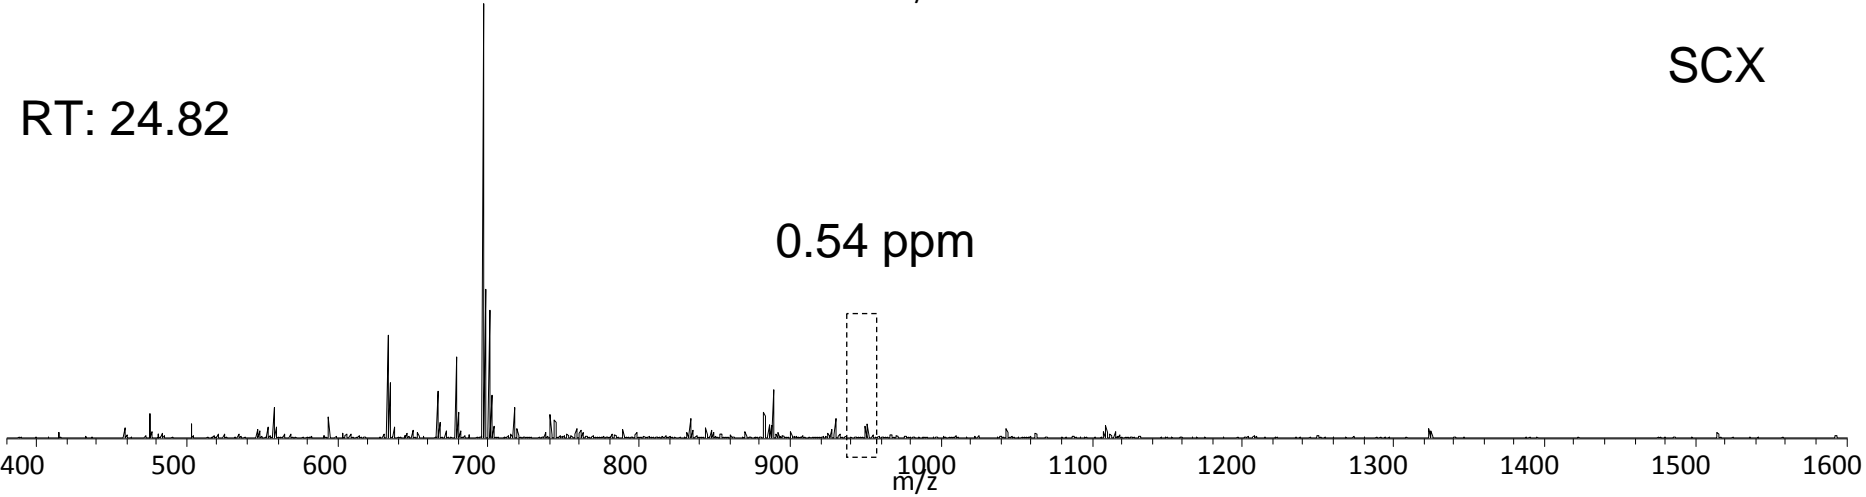

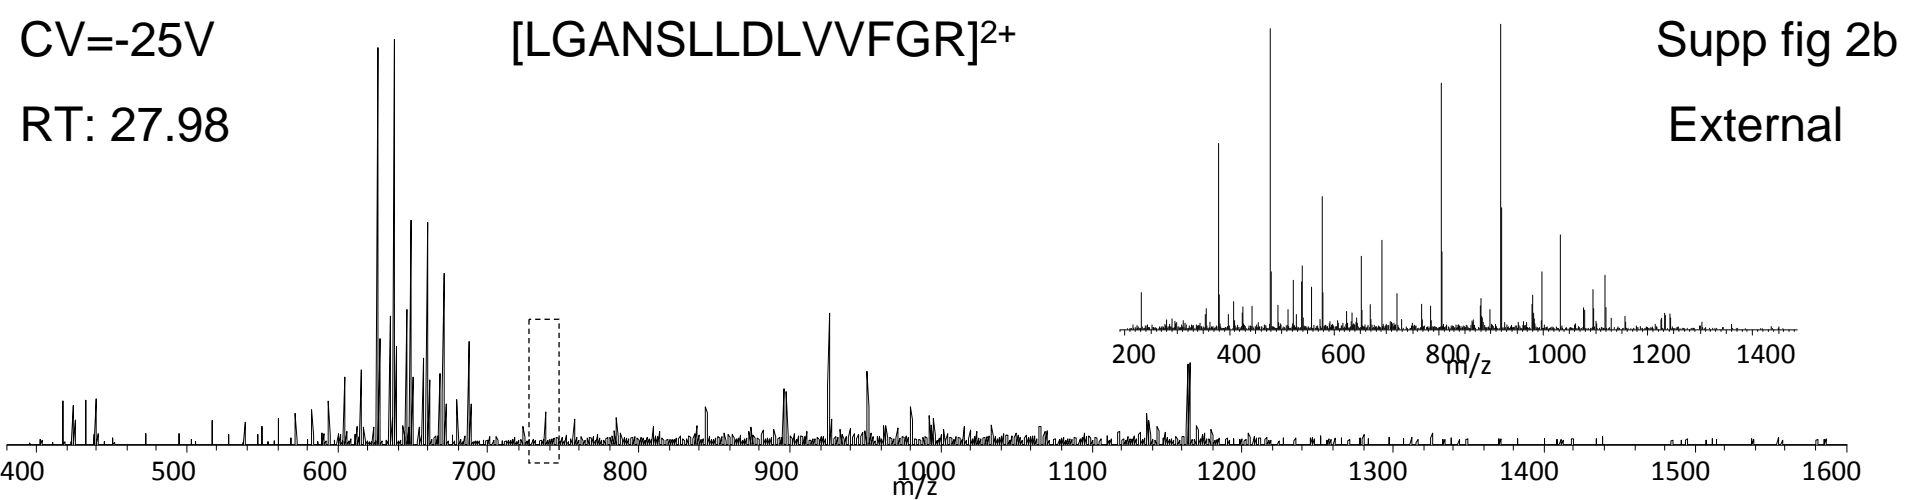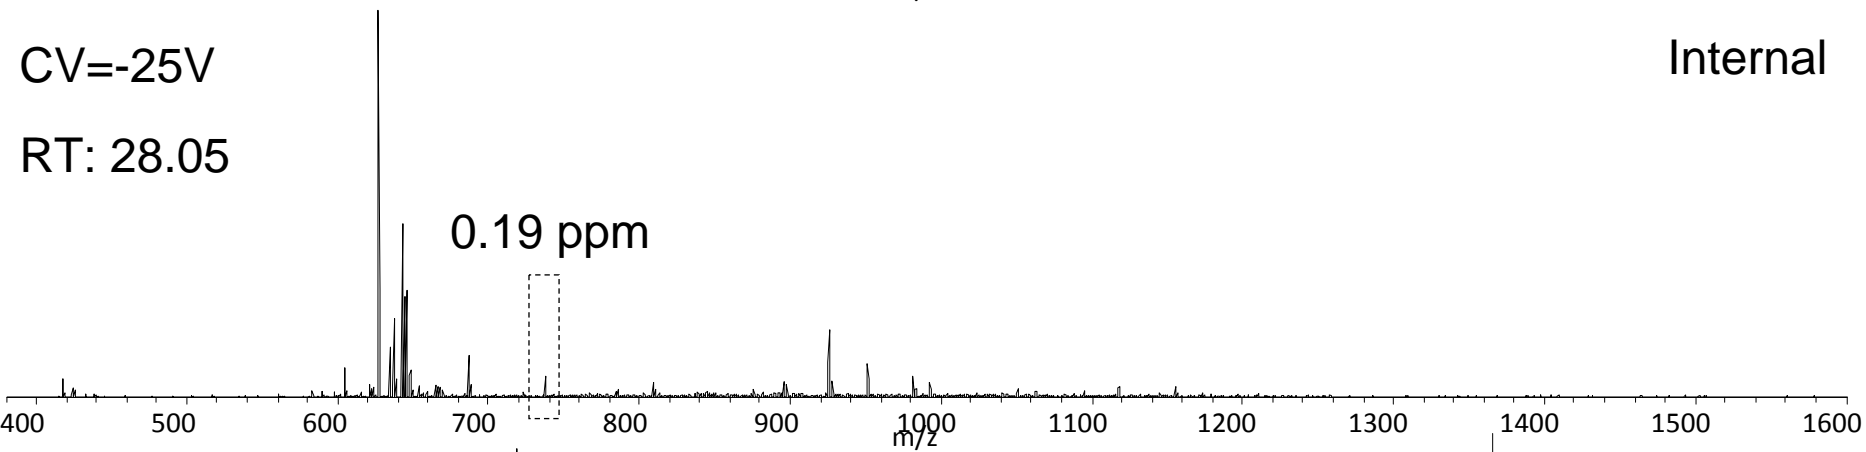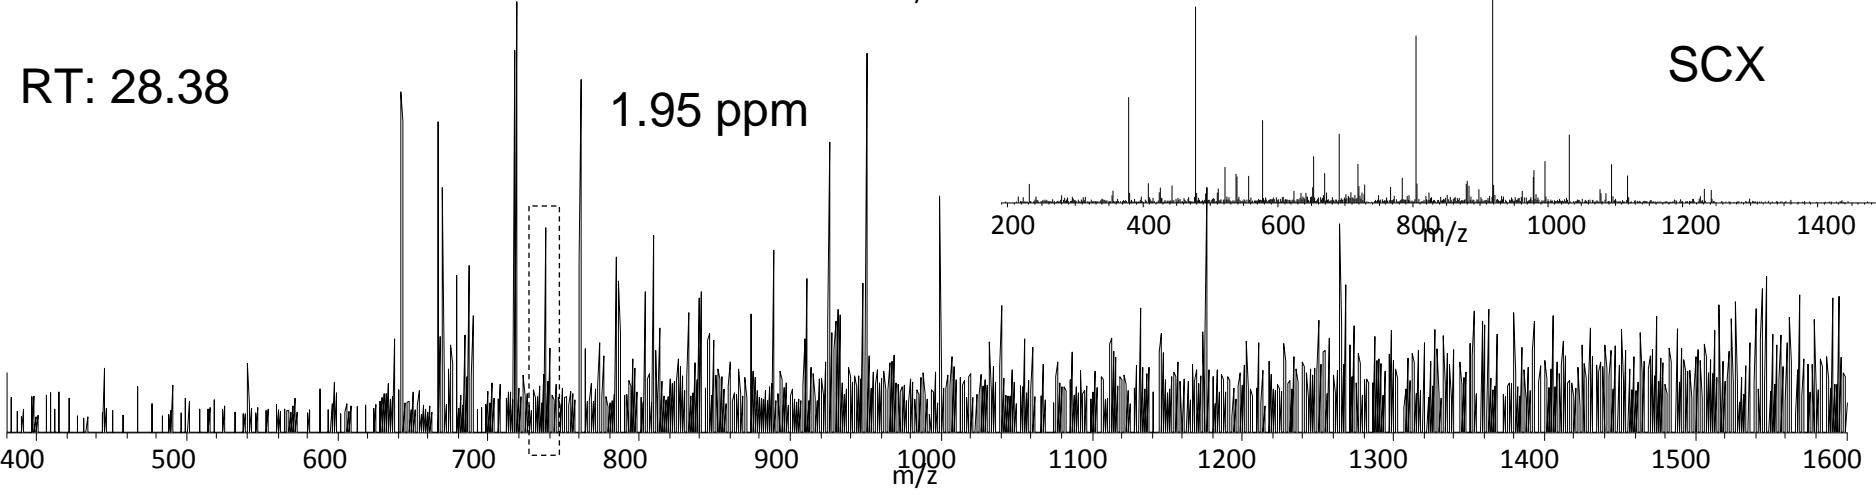

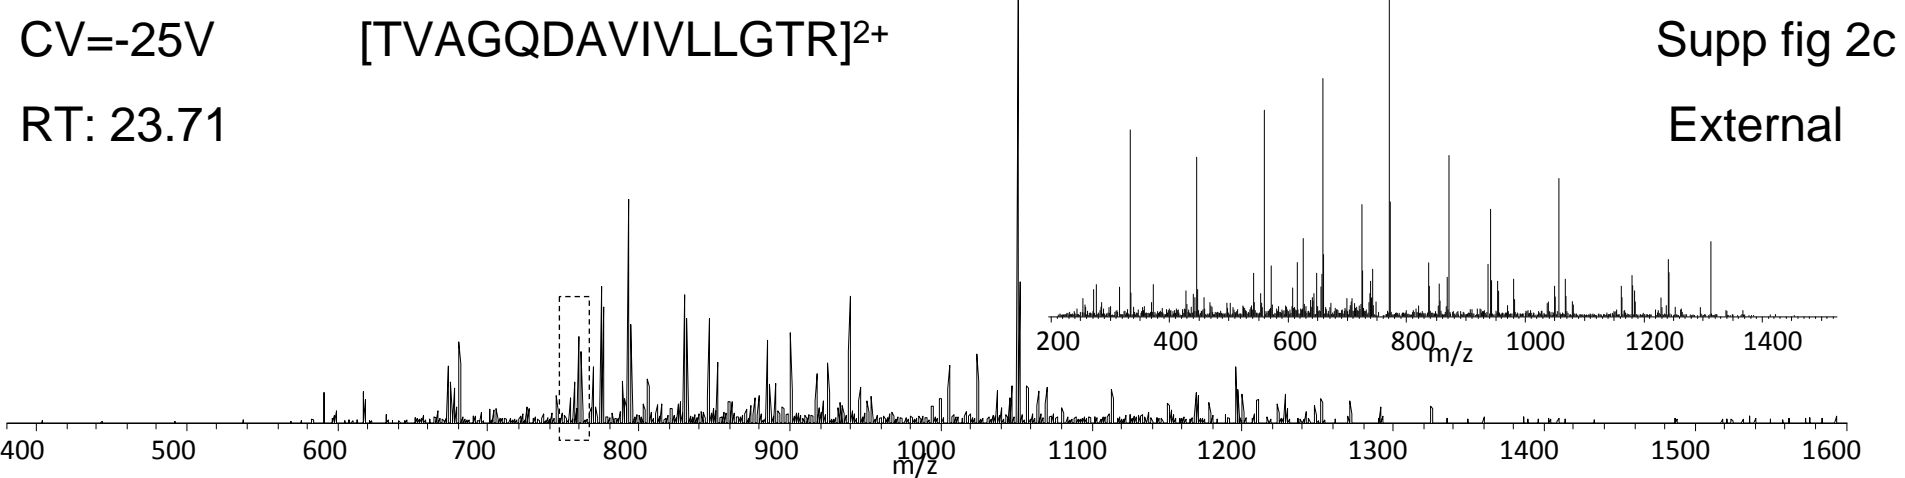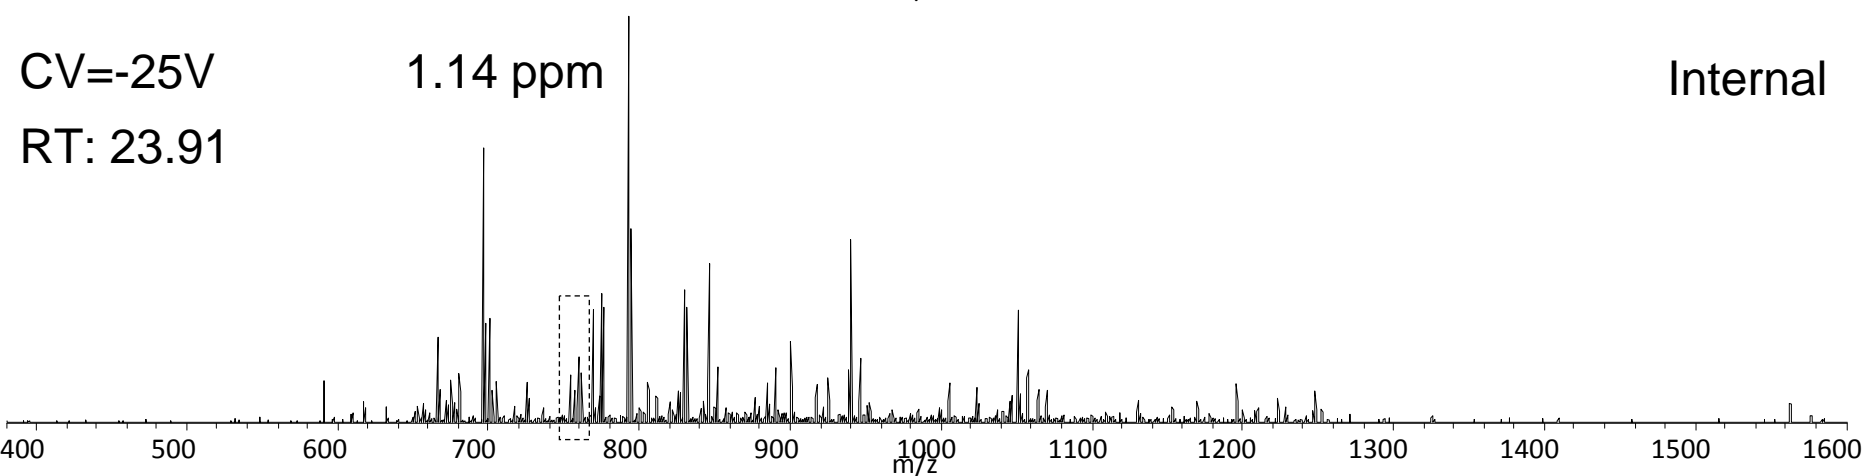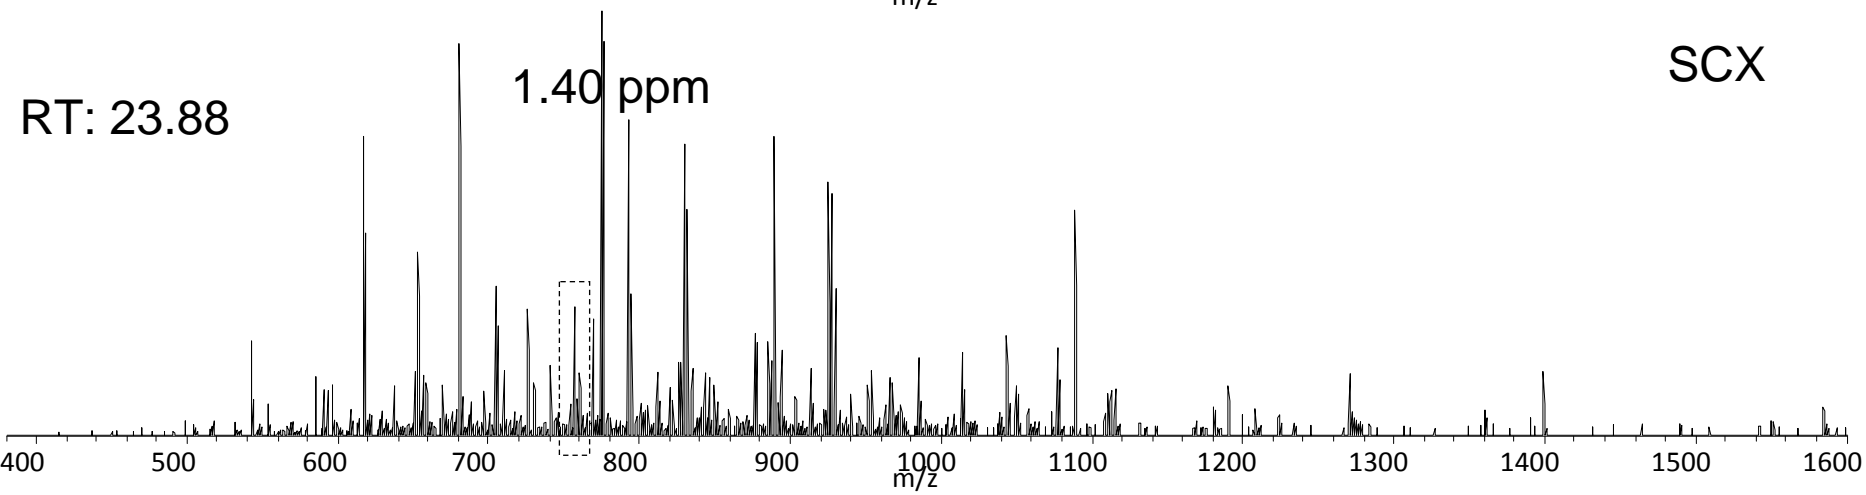

CV=-25V [QVLLSAAEAAEVILR]<sup>2+</sup>

RT: 25.92

Supp fig 2d

External

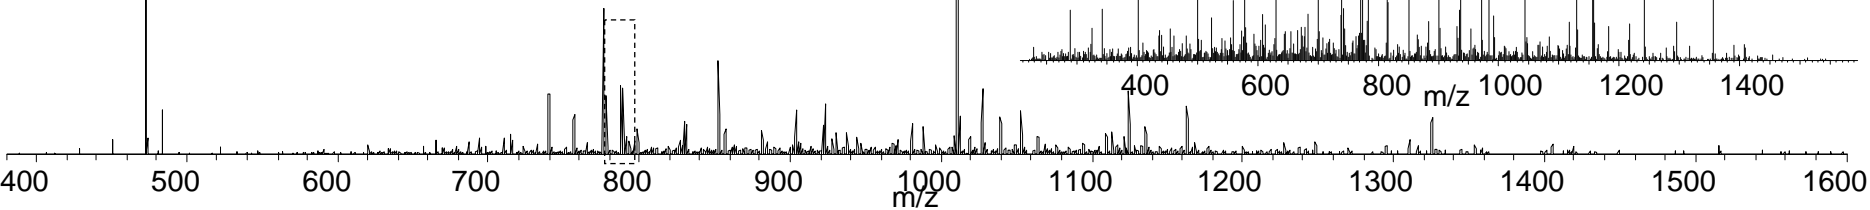

CV=-25V

RT: 26.10

0.35 ppm

Internal

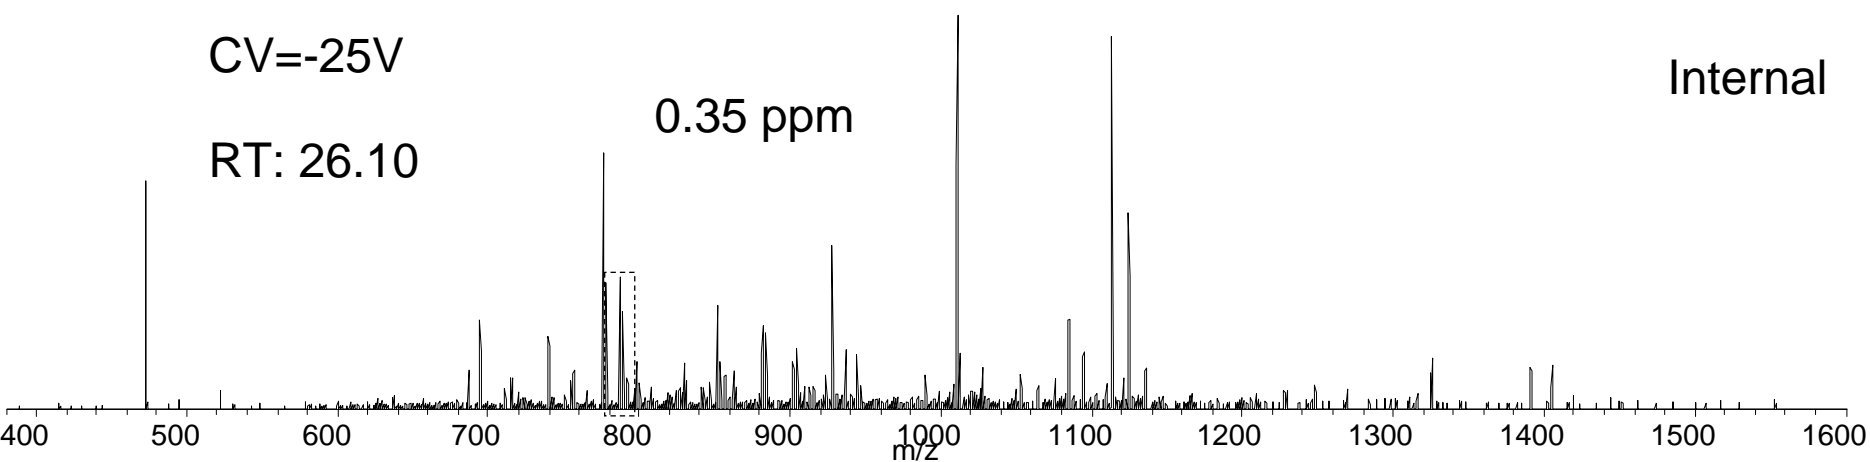



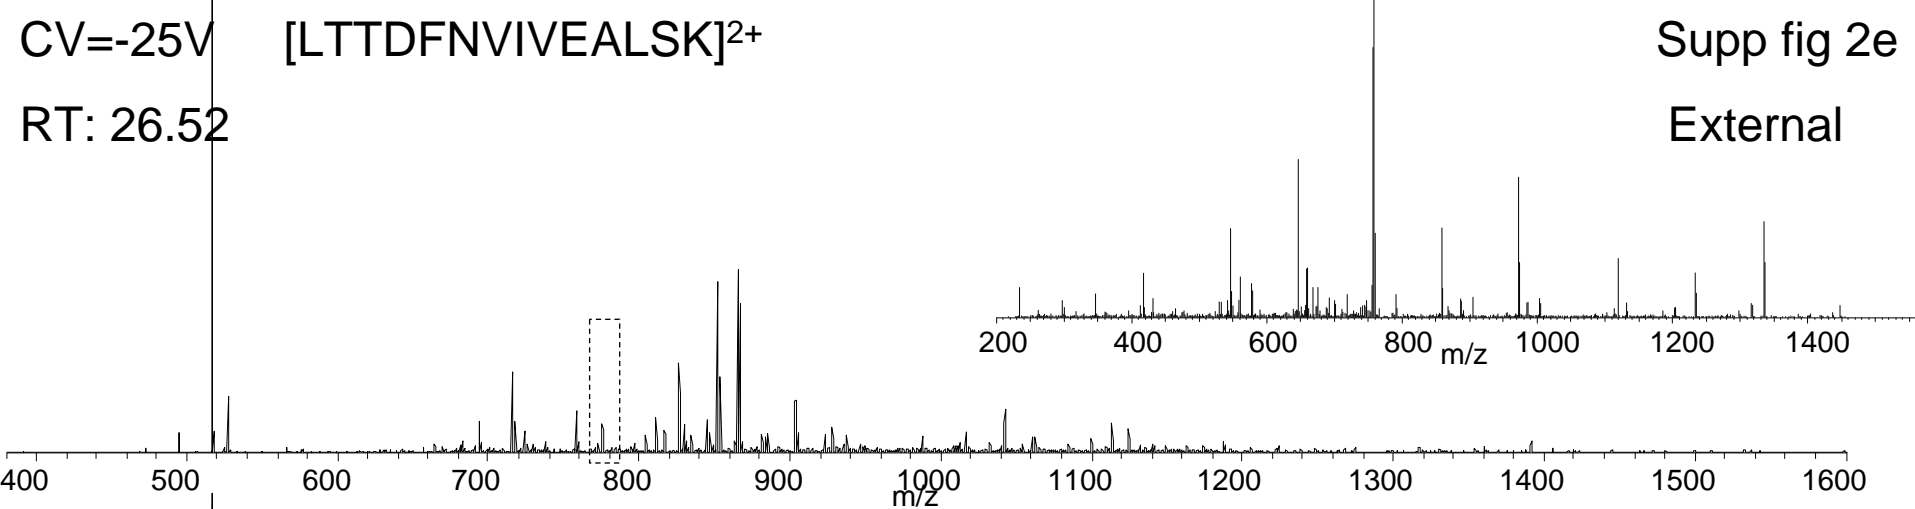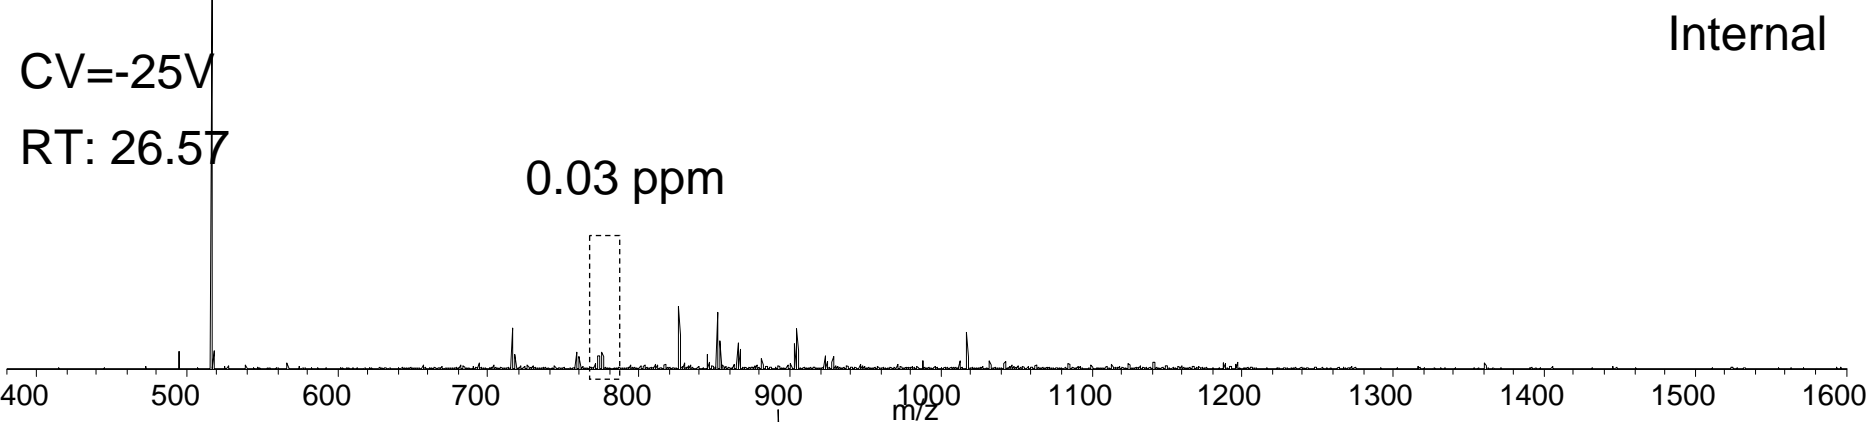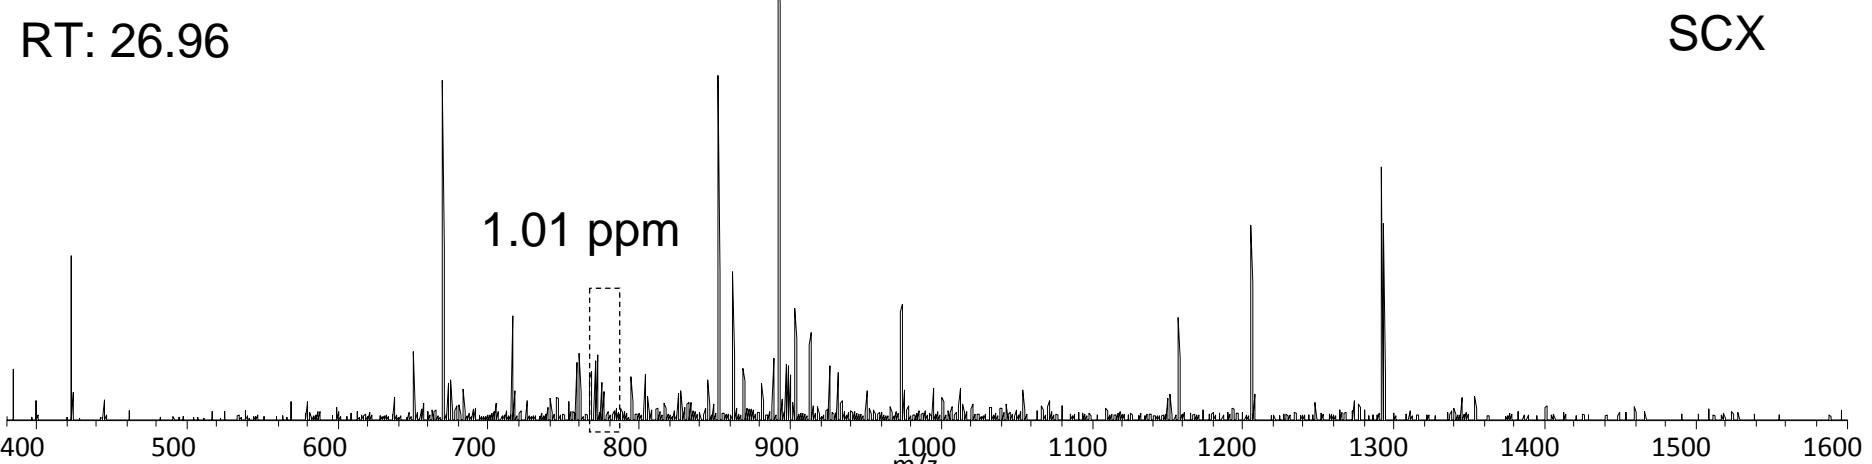

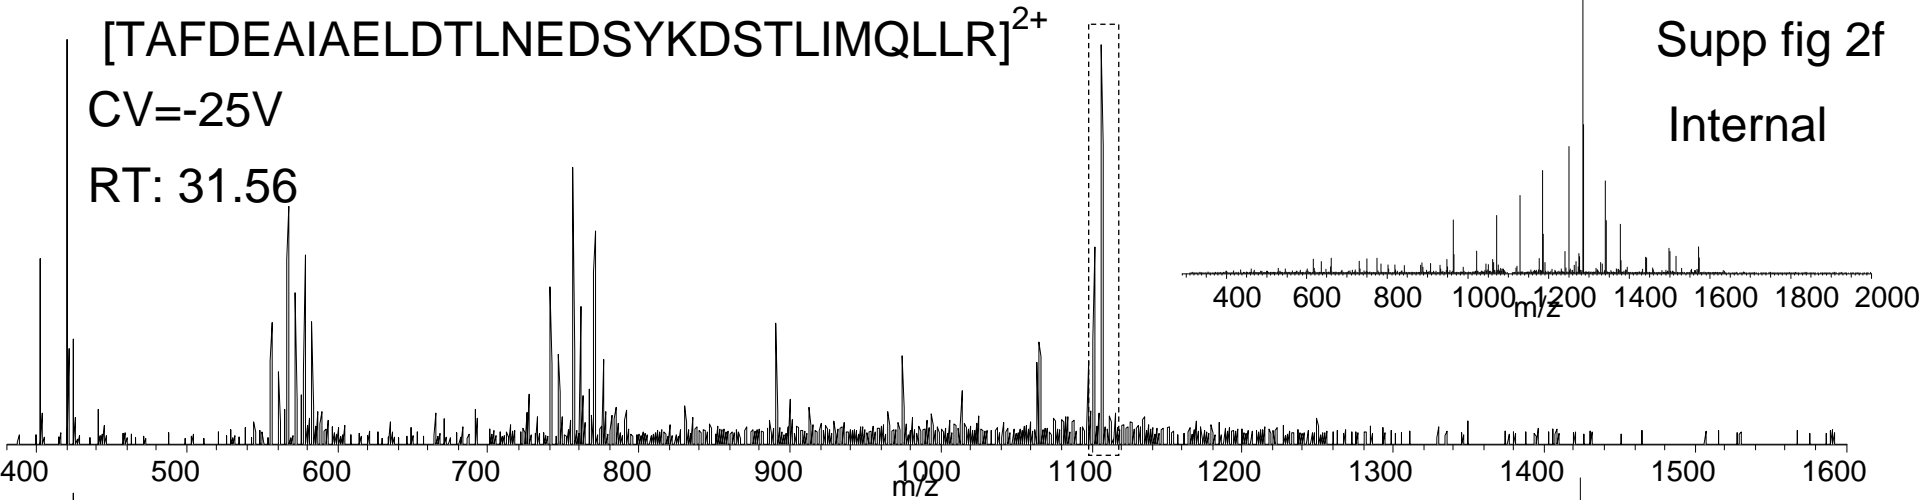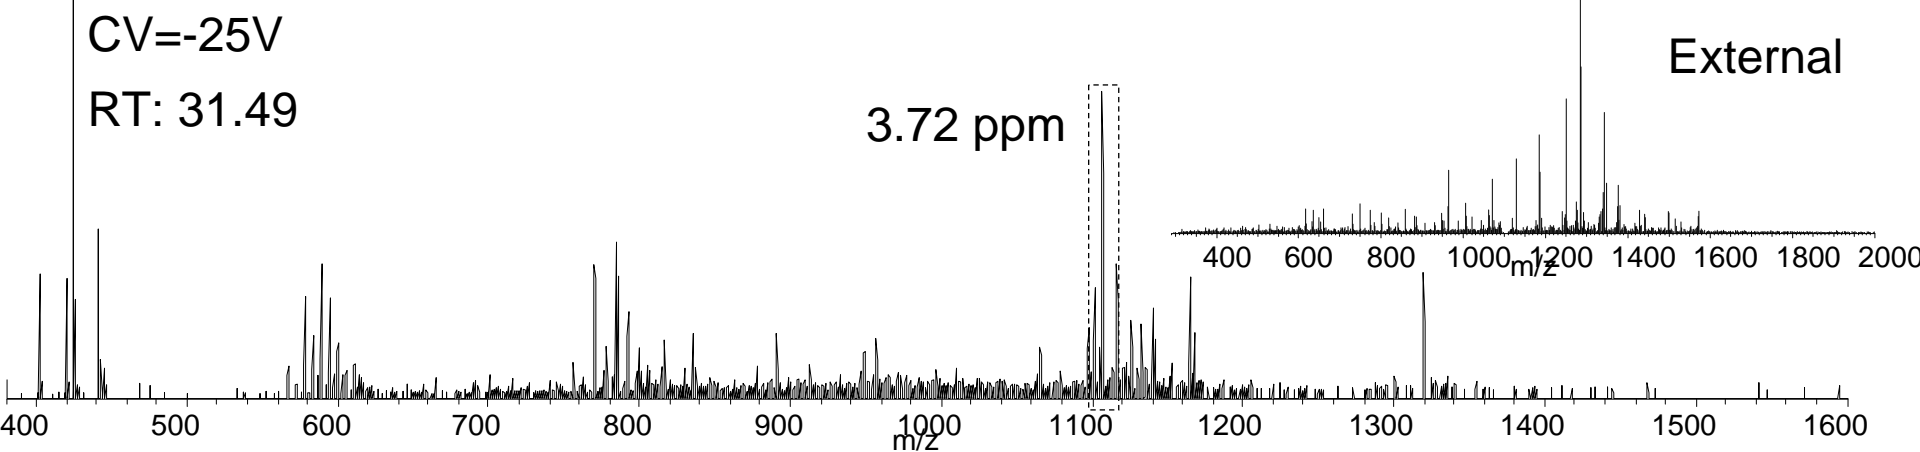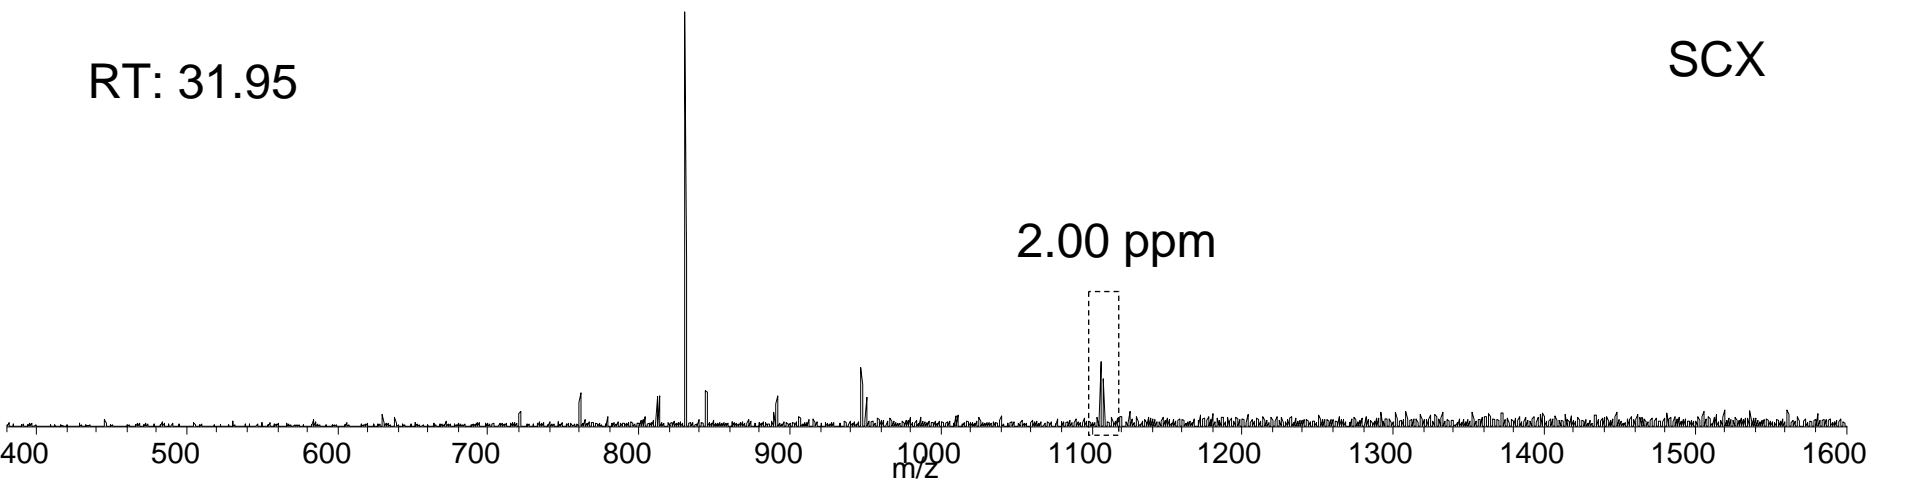

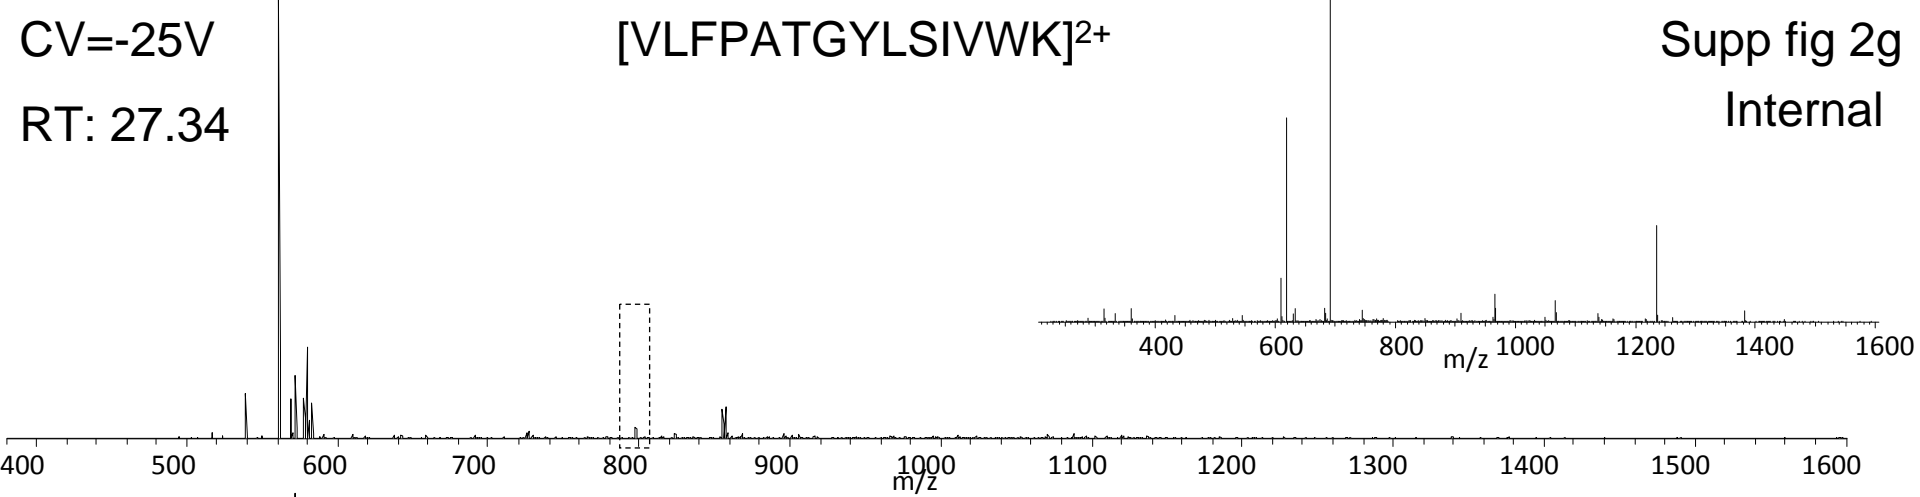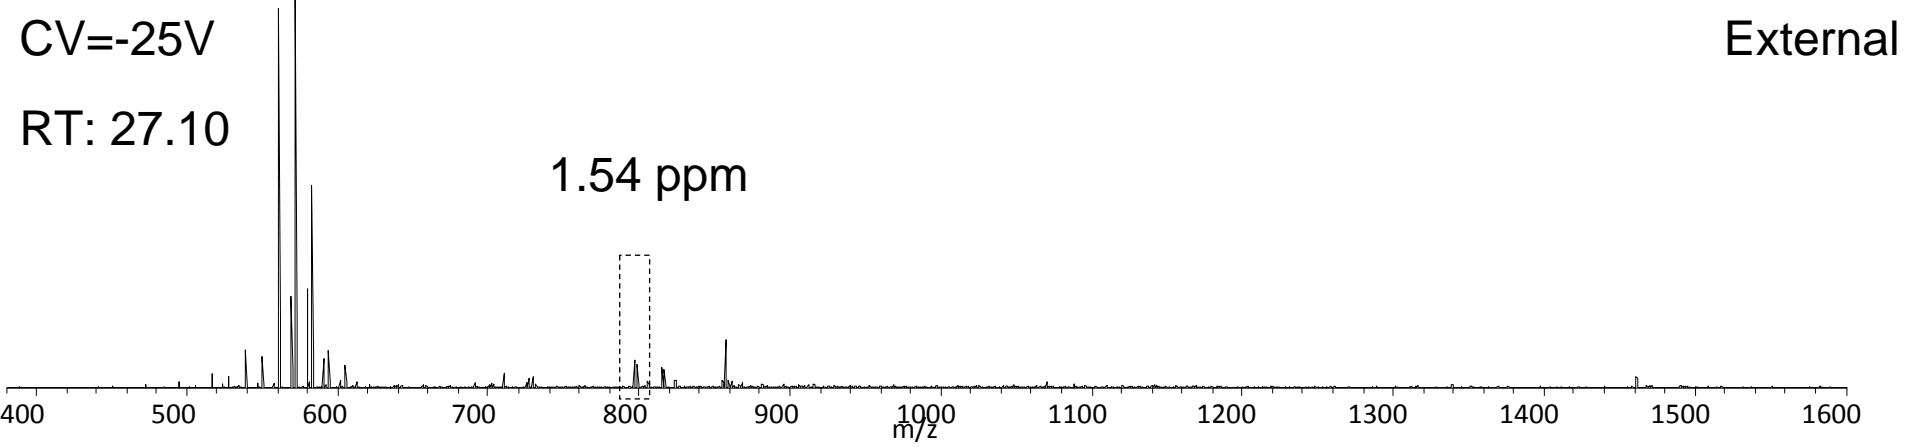

CV=-25V [GLGTGTLYIAESR]<sup>2+</sup>

RT: 20.04

Supp fig 2h

Internal

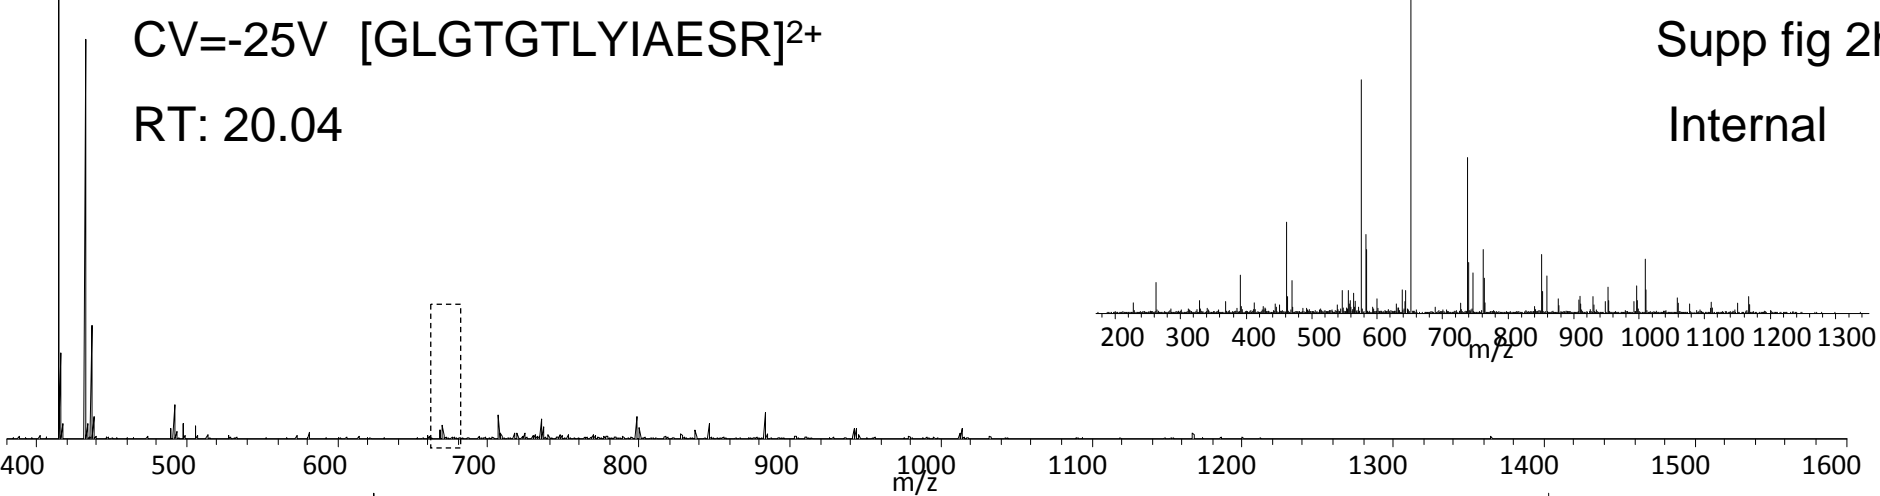

CV=-25V

RT: 17.88

External

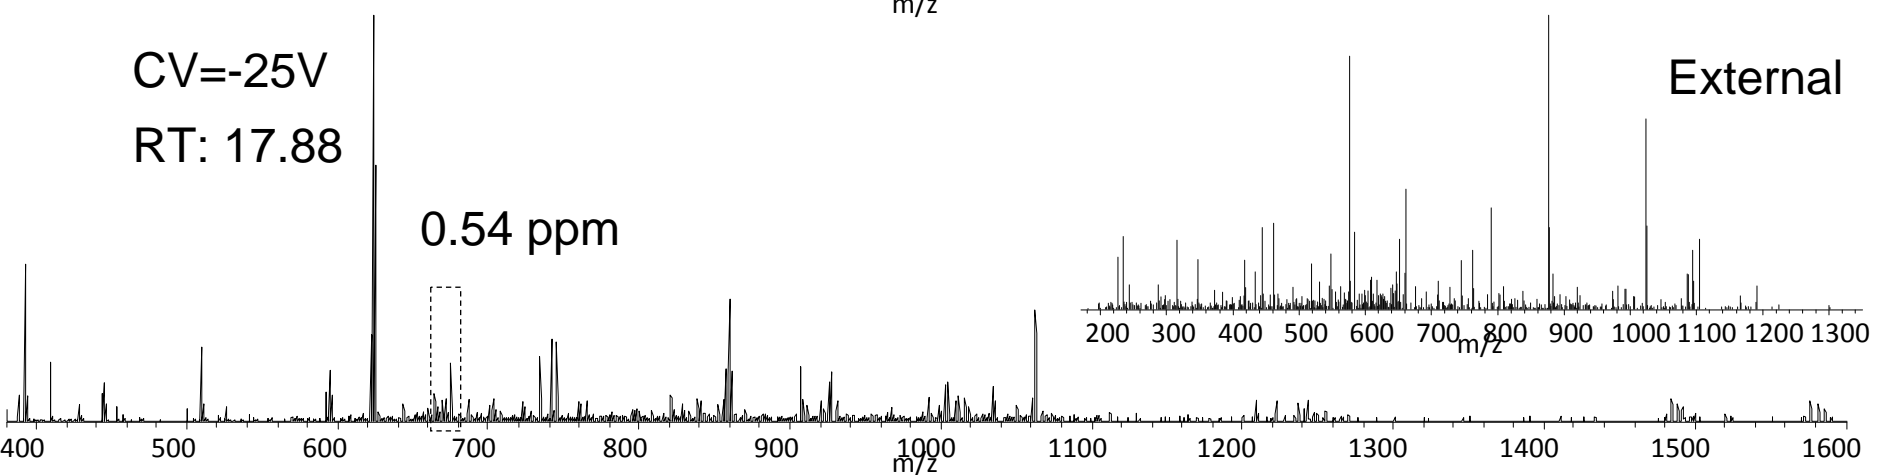

SCX

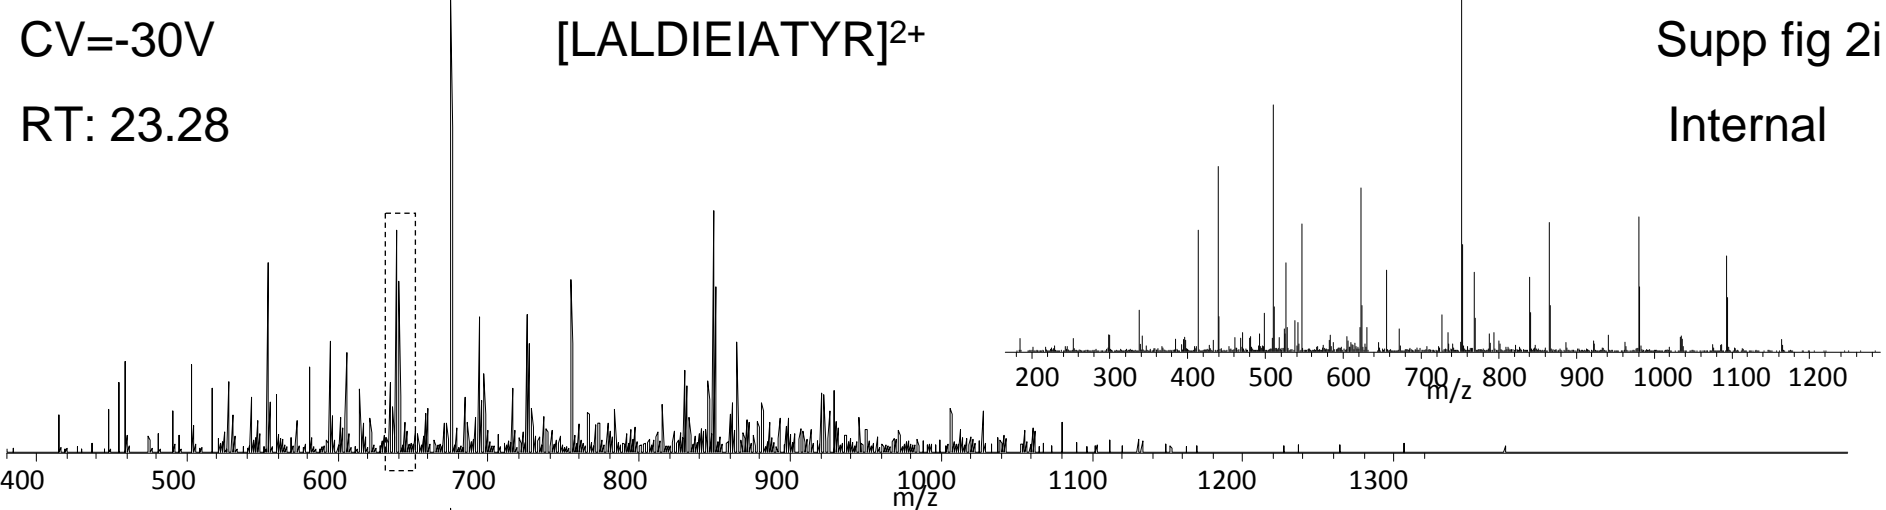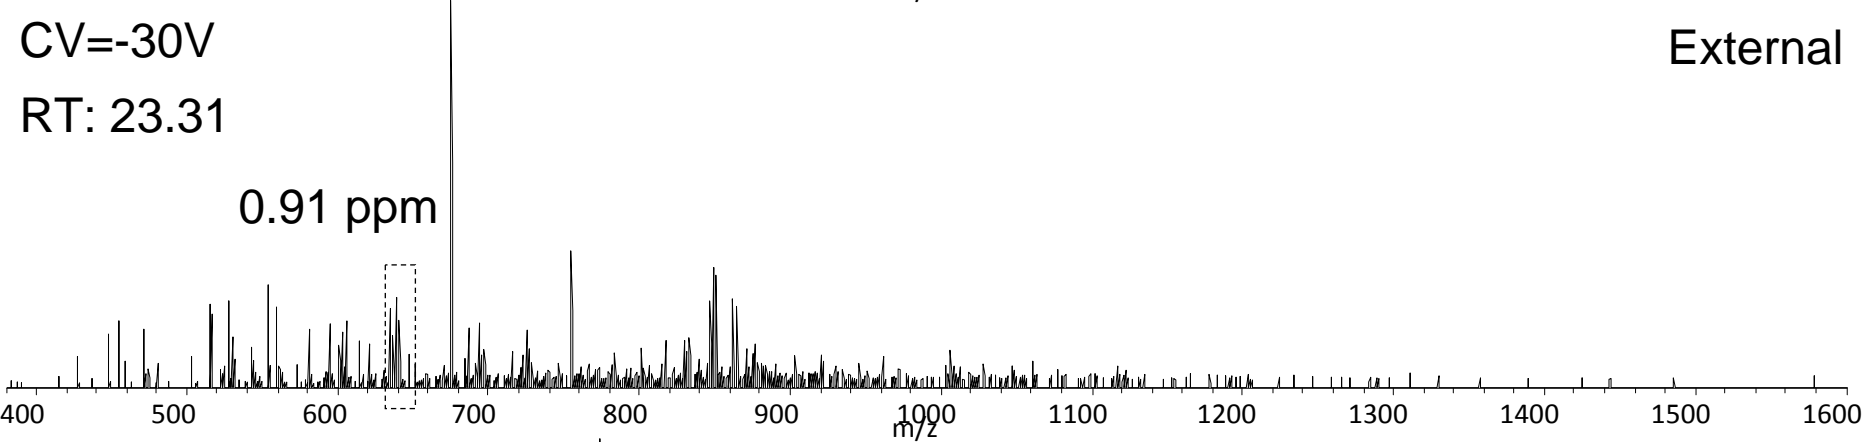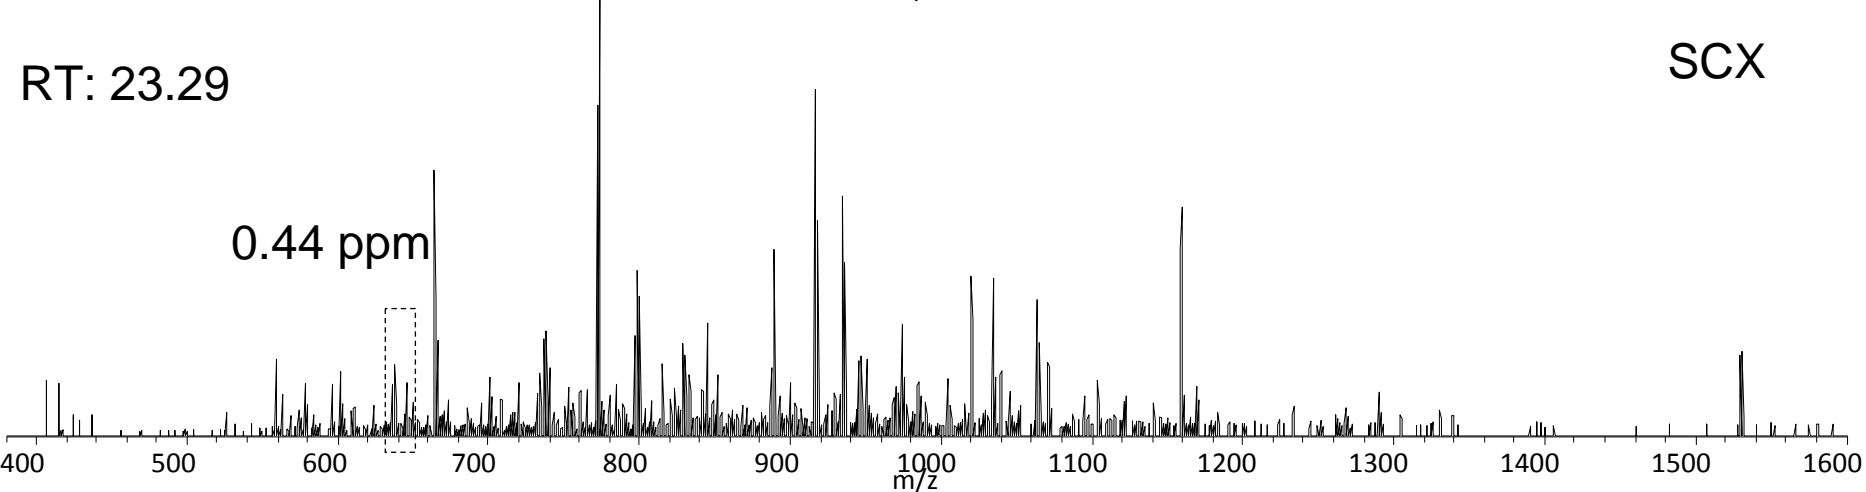

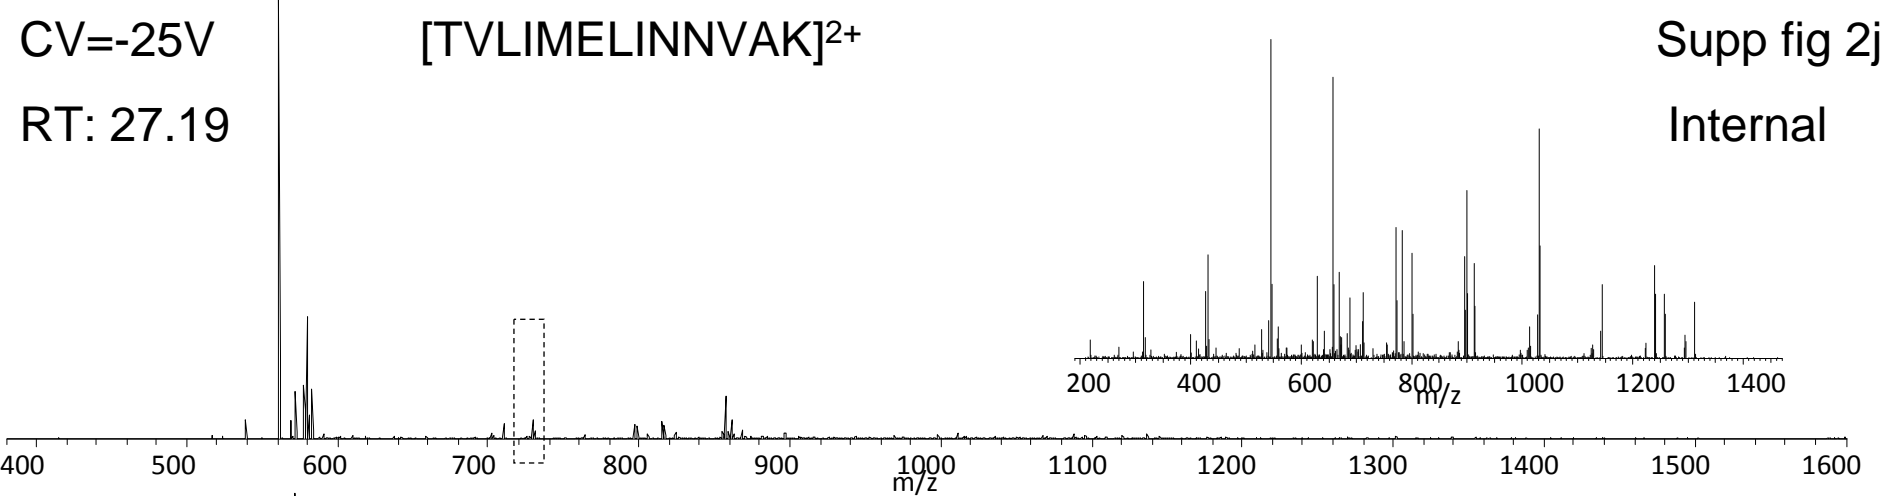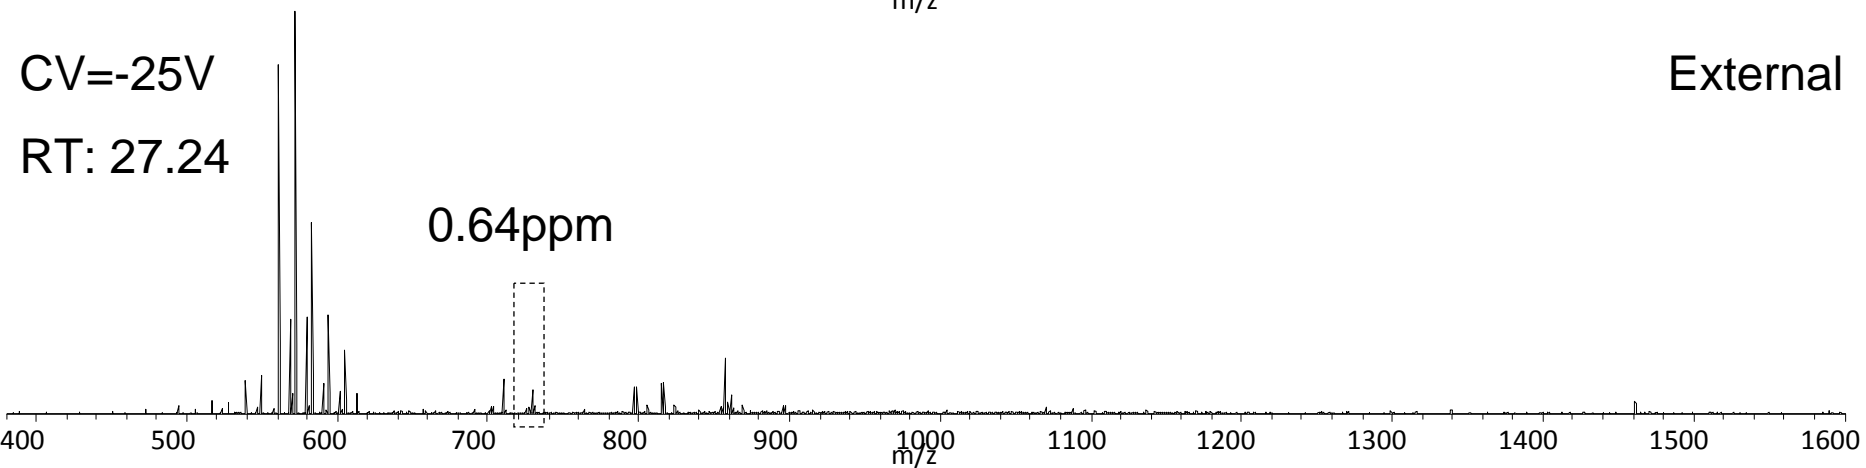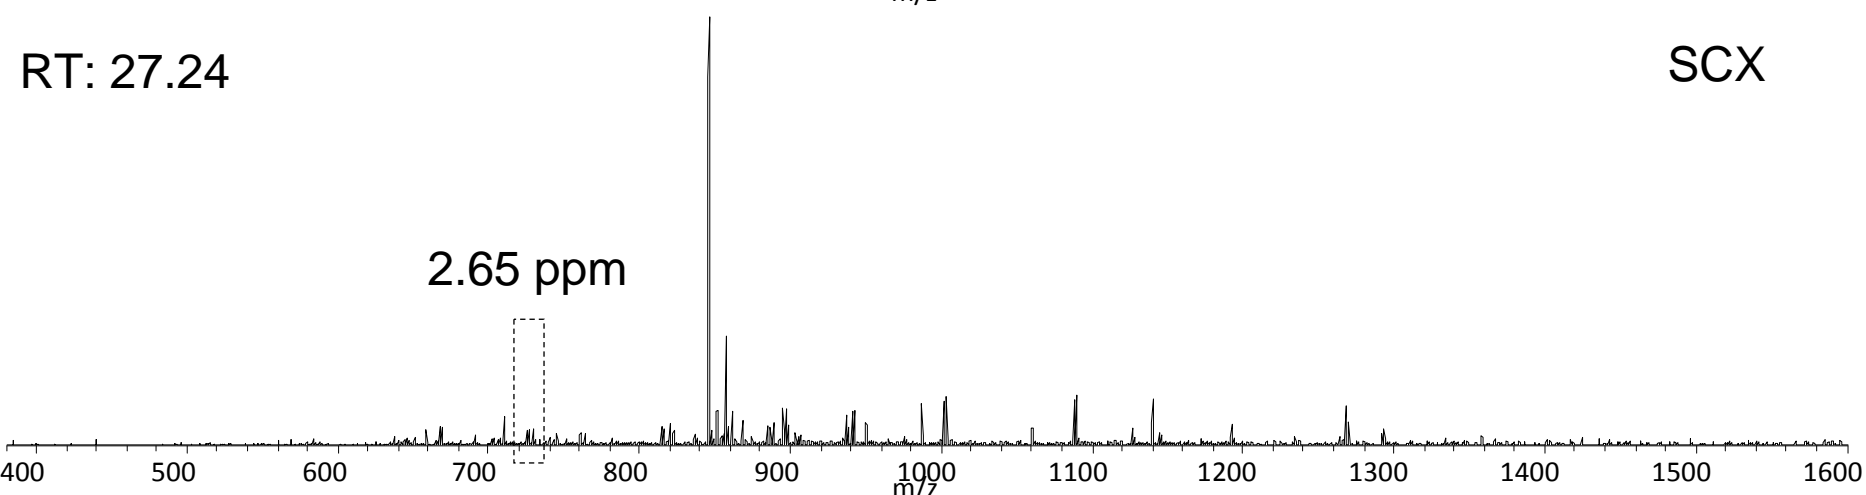

[PNSEPASLLELFNSIATQGELVR]<sup>2+</sup>

RT: 30.06

Supp fig 2k

SCX

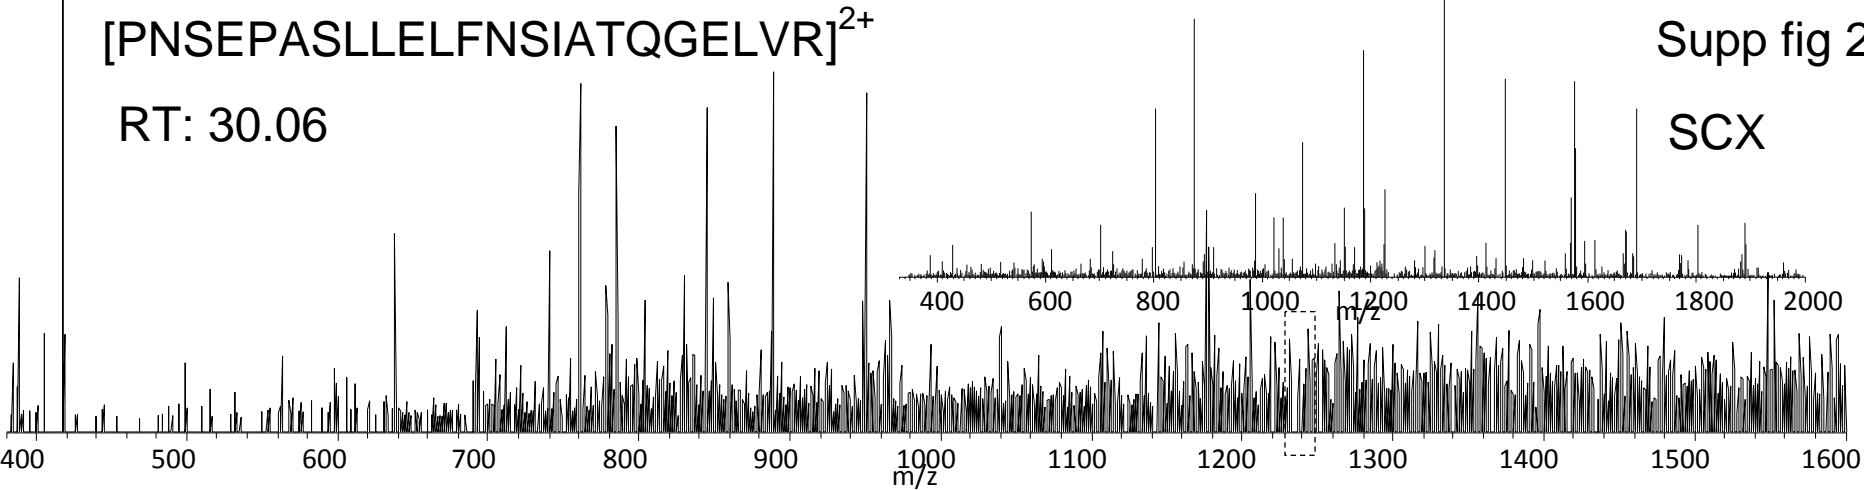

[VDNALQSGNSQESVTEQDSK]<sup>2+</sup>

RT: 15.4

Supp fig 2I

SCX

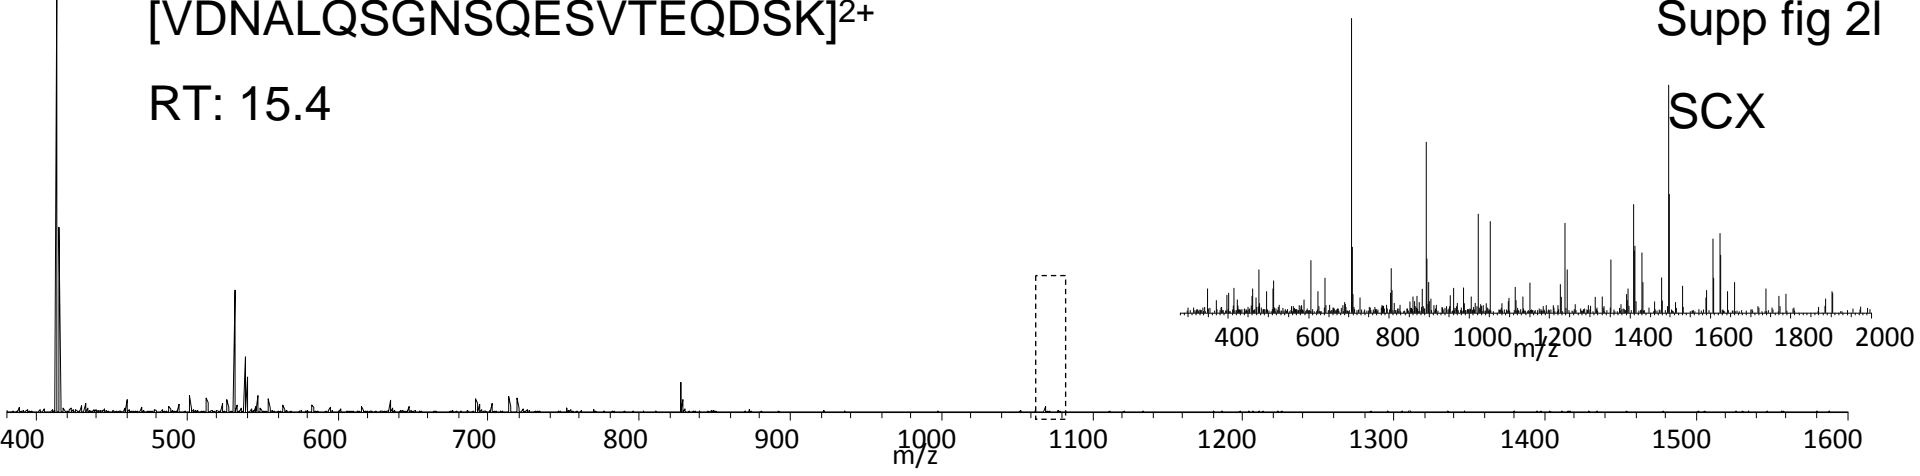



[ASASGSGAQVGGPISSGSSASSVTVTR]<sup>2+</sup>

RT: 17.14

Supp fig 2m

SCX

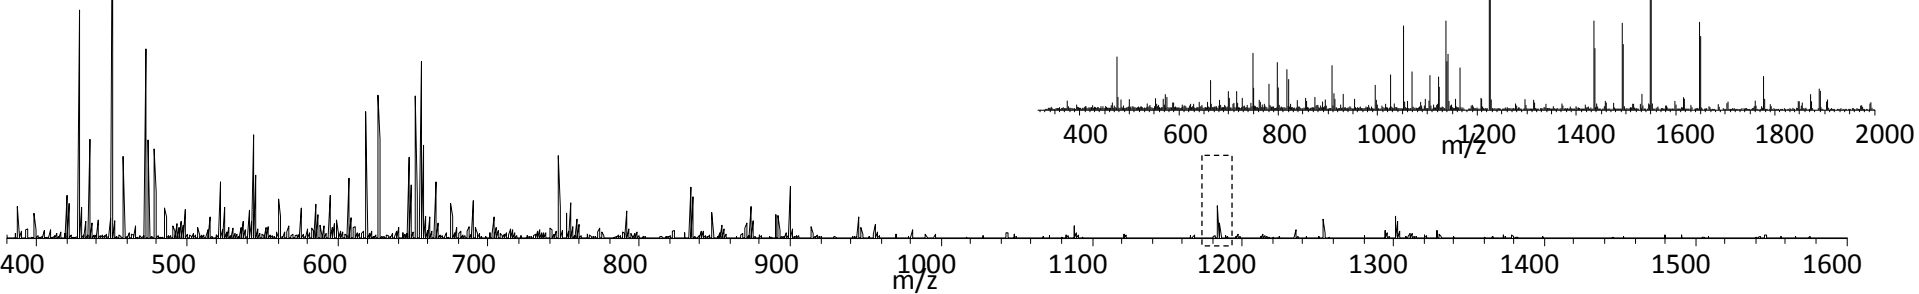

[GLAFIQDPDGYWIEILNPNK]<sup>2+</sup>

RT: 28.21

Supp fig 2n

SCX

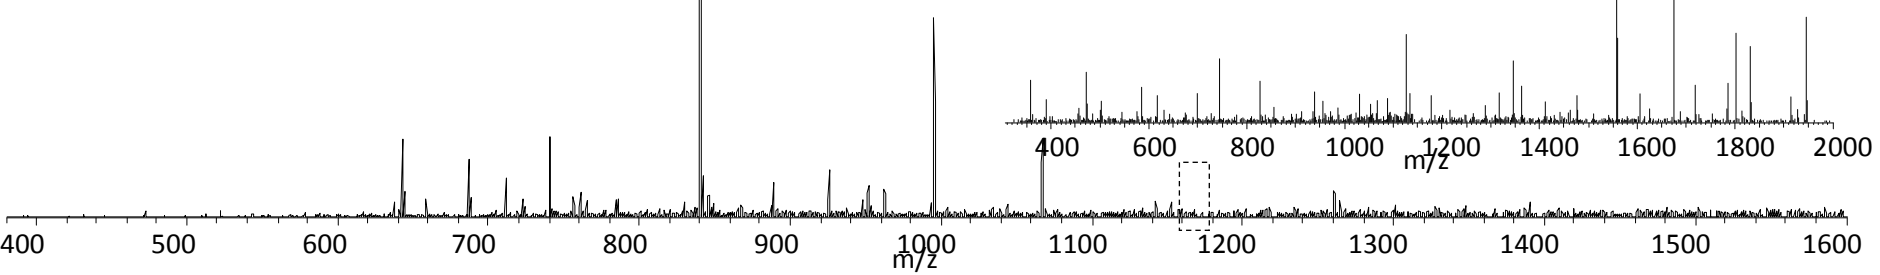

[TQLEELEDELQATEDAK]<sup>2+</sup>

RT: 23.74

Supp fig 2o

SCX

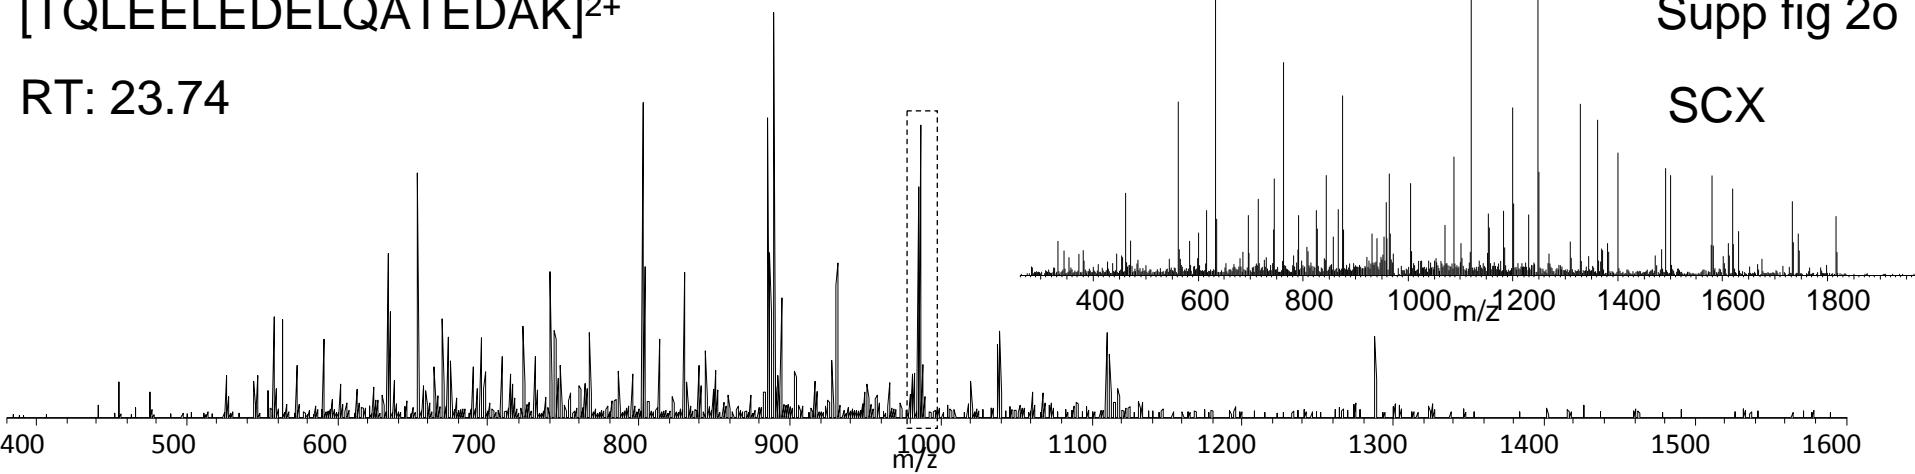

**Supplemental Table 1**

|                    |    | CID      |          |      |
|--------------------|----|----------|----------|------|
|                    |    | Internal | External | SCX  |
| Mascot (Exp value) |    | 0.005    | 0.005    | 0.02 |
| SEQUEST (Xcorr)    | 2+ | 3.7      | 3.8      | 4.48 |
|                    | 3+ | 4.58     | 4.52     | 5.25 |
|                    | 4+ | 4.6      | 4.52     | 5.26 |
|                    | 5+ | 4.7      | 4.53     | 5.26 |
|                    | 6+ | 4.7      | 4.53     | 5.27 |
|                    | 7+ | 4.7      | 4.54     | 5.27 |

|                    |    | ETD      |          |       |
|--------------------|----|----------|----------|-------|
|                    |    | Internal | External | SCX   |
| Mascot (Exp value) |    | 0.005    | 0.001    | 0.012 |
| SEQUEST (Xcorr)    | 2+ | 2.79     | 2.66     | 3.15  |
|                    | 3+ | 4        | 3.05     | 4     |
|                    | 4+ | 4.3      | 3.65     | 4     |
|                    | 5+ | 4.32     | 3.8      | 4     |
|                    | 6+ | 4.32     | 4        | 4     |
|                    | 7+ | 4.32     | 4.3      | 4     |
